# Supplementary material for: Modeling landfill CH4 emissions
Source: Oxford University Press journal article supplement (doi:10.1525/elementa.2020.00050), 2021-01-01
Supplement: supplemental_info_2021july.docx [file supplemental_info_2021july.docx]

**Supplemental Material**

Article title:

Modeling landfill CH4 emissions: CALMIM international field validation, using CALMIM to simulate management strategies, current and future climate scenarios.

Authors:

K.A. Spokas, J. Bogner, and M. Corcoran

### Table of Contents for Supplemental Material:

### Page

### Supplemental Text:

Text S1. CALMIM model overview: General & theoretical background, components, structure, input/outputs, applications/limitations, practical considerations. 3

Text S2. CALMIM program components and graphical interfaces. 7

Text S3. Historical overview: Engineered landfill practices, updating measurement & modeling practices to address site-specific and cover-specific

landfill CH4 emissions. 11

Text S4. General discussion of CALMIM output compared to IPCC (2006) and SEM methodologies. 13

### Supplemental Figures:

### Supplemental Information Figure S1 14

### Supplemental Information Figure S2 15

### Supplemental Information Figure S3 16

### Supplemental Information Figure S4 17

### Supplemental Information Figure S5 18

### Supplemental Information Figure S6 19

### Supplemental Information Figure S7 20

### Supplemental Information Figure S8 21

### Supplemental Information Figure S9 22

### Supplemental Information Figure S10 23

### Supplemental Information Figure S11 26

### Supplemental Information Figure S12 27

### Supplemental Information Figure S13 28

### Supplemental Information Figure S14 29

### Supplemental Information Figure S15 30

### Supplemental Tables:

### Supplemental Information Table S1 – Model defaults and structure 31

### Supplemental Information Table S2 – Summary of measured vs. CALMIM-modeled

### landfill CH4 emissions (g m-2 d-1) for the U.S. and international landfill sites used for

### the field validation 33

### Supplemental Information Table S3 – Global latitudinal study locations 41

### Supplemental Information Table S4 – Correlation table for climate change studies 44

### Supplemental Information Table S5 – Soil texture comparison for model output 45

### References 46

### Text S1. CALMIM Model Overview: *General & Theoretical Background, Components/Structure, Inputs/Outputs, Applications/Limitations, Practical Considerations.*

For any landfill site worldwide, CALMIM [the **CA**lifornia **L**andfill **M**ethane **I**nventory **M**odel] explicitly models cover-specific landfill CH4 emissions [g CH4 m-2 d-1] **with** and **without** methanotrophic oxidation for 10-minute time-steps and 2.5-cm depth increments over an annual cycle. Average monthly and total annual CH4 emissions with standard deviations [kg CH4] are also calculated for each cover and for the site. In addition, CALMIM automatically generates depth-based temporal figures and EXCEL-compatible files for each cover for selected model outputs (i.e., soil gas concentrations, soil moisture, oxidation activity). CALMIM and an extensive manual are freely available at: [<https://data.nal.usda.gov/dataset/calmim>].

Unlike IPCC (2006), CALMIM does not model landfill CH4 generation using a first order kinetic equation; rather, it focuses explicitly on the drivers for emissions, namely site-specific **operational factors** (i.e., area and composition of cover soils; extent of biogas recovery; landfill gas boundary concentrations at the atmospheric and landfilled waste boundaries) and **site-specific** **climate** (which drives seasonally-variable gaseous transport and methanotrophic oxidation rates in each cover soil at each site with dependencies on transient soil moisture and temperature.

To model CH4 emissions over an annual cycle for each cover, CALMIM relies on a 1-dimensional finite difference model for the simultaneous prediction of heat, water, and bidirectional diffusive gas transport (CH4, O2) through user-specified layered landfill cover materials. Via user-friendly interfaces, required inputs entered for a given site are limited to the site latitude/longitude, surface area of each individual cover soil, thickness and composition of each layer in each cover soil, and the extent of engineered biogas recovery below each cover soil (% area). Cover soils can include local natural soils, bulky aggregate or gravel layers, layers of synthetic materials (i.e., geomembranes, tire chips), and “alternative daily covers” (typically recycled waste fractions) approved by various U.S. states. Where applicable, the extent of installed engineered subsurface biogas recovery is entered as the % of surface area for each cover; this can include either vertical wells or horizontal collection systems [installed concurrently with filling]. CALMIM integrates site‐specific data (latitude/longitude; cover design) with climatic simulations to provide input for coupled soil microclimate and gaseous transport models which estimate emissions from individual daily, intermediate, and final cover soils inclusive of CH4 oxidation over a typical annual cycle. Optional inputs include seasonal vegetation (as % of surface area for a specific cover), % organic C for a specific cover, and soil gas CH4 and O2 concentrations at the base of the cover.

SI.Table S1 provides an overview of the CALMIM model structure, components and default boundary conditions. For more detailed theoretical background and model structure (including embedded USDA climate models), supporting laboratory and oxidation modeling studies, previous field validations, historic California and other applications, please consult: (Bogner et al., 2014; Bogner et al., 2010; Bogner et al., 2011; Cambaliza et al., 2015; Cambaliza et al., 2017; Spokas et al., 2011; Spokas et al., 2015; Spokas and Bogner, 2011).

In short, CALMIM integrates site‐specific data (latitude/longitude and cover design) with climatic simulations to provide input for coupled soil microclimate and gaseous transport models in order to estimate emissions from individual daily, intermediate, and final cover soils inclusive of CH4 oxidation over a typical annual cycle. Brief additional discussion of the major drivers for CH4 emissions within CALMIM is given below, namely:

***Site-specific operational characteristics*:** the thickness, texture, and surface area of each individual cover material, as well as the extent [% of surface area] of subsurface engineered gas recovery and seasonal vegetation for each cover.

As discussed above, landfills can have multiple daily, intermediate, and final covers with a variety of designs, including local soils (relying on the USDA soil triangle), alternative daily and intermediate covers permitted under current regulations, and geosynthetic materials. In CALMIM, pull-down screens facilitate entry of soil composition and thickness information. Optional inputs include % organic C and seasonal vegetation (as % of area) associated with each cover soil.

For each site-specific cover, CALMIM relies on paired top and bottom soil gas CH4 and O2 concentrations as the boundary conditions for diffusive flux. These can be default values based on literature **[SI.Table S1]** or can be customized by users [e.g., soil gas CH4 and O2 based on measured soil gas profiles]. In general, biogas recovery lowers soil gas CH4 concentrations at the base of the cover, thus affecting boundary conditions for diffusive flux. Seasonal vegetation alters the surface energy balance, affecting temperature profiles in cover soils.

Methanotrophic oxidation rates vary with depth depending on soil temperature and moisture profiles. See also “climate” discussion below. The empirical relationships for oxidation used in the CALMIM model were derived from a series of >900 laboratory incubations using landfill cover soils to determine relationships between methanotrophic activity and both soil temperature (see SI.Figure S1) and soil moisture potential (SI.Figure S2). See Spokas and Bogner (2011) for a complete description of supporting laboratory studies.

Because heterotrophic respiration and methanotrophy compete for O2 in soil profiles, CALMIM also includes a standard relationship from the literature to subtract expected respiration losses before O2 availability for CH4 oxidation (see Spokas et al., 2011).

***Site-specific climate***:Required inputs are limited to daily min/max temperature and daily precipitation for an annual cycle (365 d): CALMIM models temporal soil moisture and temperature fluctuations (10-min. timesteps) in each individual cover. Subsequently, these provide inputs for modeling the bidirectional diffusional transport rates of CH4 and O2 in each cover soil, as well as variable methanotrophic oxidation rates through each soil profile (Spokas and Bogner, 2011).

CALMIM includes embedded USDA global climate models for 30-year average weather data with 0.5 X 0.5 deg. reliability (Global TempSIM, Global RainSIM, SOLARCALC [surface energy balance], STM2 [soil temperature/moisture]). Importantly, CALMIM can also be run with site-specific *annual weather data*. In general, we have historically recommended 30-year average climate data for inventory reporting purposes, with parallel use of annual weather data for shorter-term applications, including comparisons with site-specific field campaigns deploying a variety of techniques (see Spokas et al., 2011, 2015; Cambaliza et al., 2017). However, given the temporal and spatial variability of current weather patterns at many global locations, coupled with projected weather volatility predictions under many future climate scenarios (i.e. CMIP5), we now recommend, as possible, the use of *annual* weather data for *annual* inventory reporting and other site simulations. Also, NASEM (2018) recently recommended higher resolution [0.1 X 0.1 deg.] gridded CH4 inventories for major U.S. CH4 sources. The embedded default data [30-year average climate with 0.5 deg resolution] can provide a historical perspective for specific sites, as well as an initial solution for more remote global locations. In summary, use of site-specific annual weather data (daily min/max temperature; daily precipitation) is highly recommended.

Below are selected historic **Examples** for:

1. CALMIM modeling compared to field data using multiple methods at a single site [SI.Figures S3 and S4].
2. Historic site-specific California inventory estimates using CALMIM compared to IPCC (2006). [SI Figure S5]
3. For comparisons with site-specific field measurement campaigns, we recommend use of CALMIM monthly average emissions with SDs. See SI.Figure S3 and SI.Figure S4 (Cambaliza et al., 2017) for examples of CALMIM output compared to field data at one Indiana landfill site using several techniques for whole site emissions as well as individual cover emissions. The techniques included aircraft mass balance, tracer diffusion, vertical radial plume mapping, and static chambers. Some field measurements were repeated in multiple months while others were concentrated in selected months.

The first figure plots “whole landfill” field results from multiple methods referenced to their month of deployment, as well as average monthly CALMIM modeled emissions with and without methanotrophic oxidation. This type of plot provides a useful monthly annual emissions “framework” for comparison of multiple types of “whole landfill” field data [with corresponding uncertainty estimates] to average monthly CALMIM-modeled emissions with monthly SD’s.

The second figure plots emissions from individual cover soils (SI Figure S4) and CALMIM modeling on a similar monthly framework. Interestingly, at this site, more than 90% of the total emissions were attributable to the small daily filling area: a previous intermediate cover had been stripped prior to vertical expansion for new cell development. Thus, the working area, which was covered by a few inches of soil at the end of each day, directly overlaid older methanogenic waste yielding very high CH4 emissions per m2.

1. Figure S5 (Spokas et al., 2015) provides an example for CALMIM applied to a statewide GHG inventory, namely the 2010 California site-specific landfill CH4 emissions inventory. This figure directly compares site-specific CH4 emissions estimates using CALMIM to previously-reported estimates using IPCC (2006): the latter includes typical assumptions of: a) 75% CH4 “recovery efficiency” for sites with biogas recovery and b) constant 10% methanotrophic CH4 oxidation.

Note the wide disparity for individual site measurements between the two methodologies: a major reason is that IPCC (2006) results in a primary dependency for emissions on the mass of waste in place at each site (Figure S5C), which is not true, whereas the CALMIM results strongly reflect site-specific seasonal climate variability for various cover soils, i.e. < g m-2 d-1 CH4 emissions when MAP exceeded 500 mm. Moreover, as opposed to emissions, site-specific 2010 data for *measured* CH4 recovery at each California site demonstrated a robust linear relationship with site-specific waste in place. See additional discussion, supporting data, and figures in Spokas et al. (2015).

Finally, it is important to note that CALMIM does not currently take into account other site-specific practices which may result in CH4 emissions from landfills and co-located activities. As required under current U.S. regulations [RCRA Subtitle D], it is assumed that fugitive emissions associated with compromised cover materials and gas recovery infrastructure are remediated following quarterly walk-over surveys using portable CH4 detectors to locate elevated CH4 concentrations near the ground surface. Periodic CH4 emissions can also occur from non-landfilling waste activities co-located with landfills [i.e. windrow composting facilities becoming anaerobic during wet weather; fugitive emissions from anaerobic digesters for organic waste fractions; leakages associated with unit operations from wastewater treatment plants; on-site recycling activities for organic waste or waste fuels]. Also, at some sites, it may be difficult to distinguish landfill emissions from adjacent non-landfill sources of CH4 [i.e., cattle operations/enteric fermentation, manures; oil/natural gas exploration, production, treatment, storage & transport; natural leakages from terrestrial/marine wetlands & geologic sources]. See recent publications for site-specific examples and discussion: i.e., Cusworth et al. (2020) for discussion of co-located anaerobic digestion and composting emissions observed during high-altitude landfill monitoring campaigns; Duren et al. (2019) regarding “super-emitter” fugitive emissions, often termed “hotspots” on landfills.

### SI. Text S2. CALMIM Program Components and Graphical Interfaces:

CALMIM, written entirely in JAVA, currently consists of 531Java Classes and is written in the NetBeans Integrated Developer Environment (IDE). NetBeans IDE and NetBeans Platform are based on software from netbeans.org, which has been dual licensed under the Common Development and Distribution License (CDDL) and the GNU General Public License Version 2 with Classpath exception. For more information, please visit [www.netbeans.org](http://www.netbeans.org).

CALMIM uses a total of 21 integrated libraries, with the most significant ones being:

- **jFreeChart** – Provides the graphical display of the generated data - see <http://www.jfree.org/>
- **Liquid-Look-n-Fee**l – Overall look-n-feel of the program
- **PTPLOT 5.6** – plotting program to display data - <http://ptolemy.eecs.berkeley.edu/java/ptplot/>
- **NanoXML** – Embedded XML parser for the CMM preference files <http://nanoxml.sourceforge.net/orig/>
- **XStream** – simple library to aid in saving and loading XML class library files (CMM preference file) - <http://xstream.codehaus.org/>
- **MigLayout** – layout manager for GUI windows <http://miglayout.com/>
-
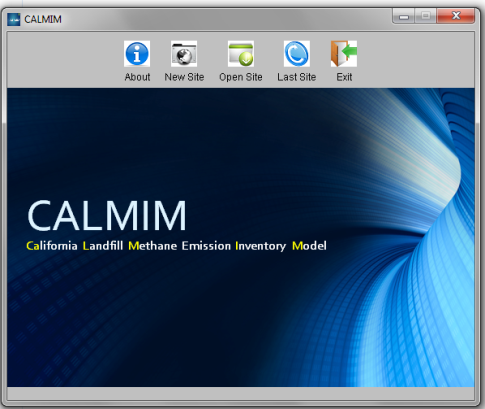
Improved main menu graphics and menu structures are described below:

Old Version New Version

.

- Improved model performance through decreased run times.
- Corrected minor bugs in calculation modules to reduce memory leaks during program execution.
- Multi-platform capability (PC, MAC O/S, UNIX).
- Expanded ability to run 12 different covers concurrently for one site using 30 available materials (standard soil textures and alternative cover materials).

### Specific Program improvements include improved graphical interfaces, expanded automatic generation of output files and graphs, and more user-friendly features. For example, the improved on-line map feature for site selection is shown below:


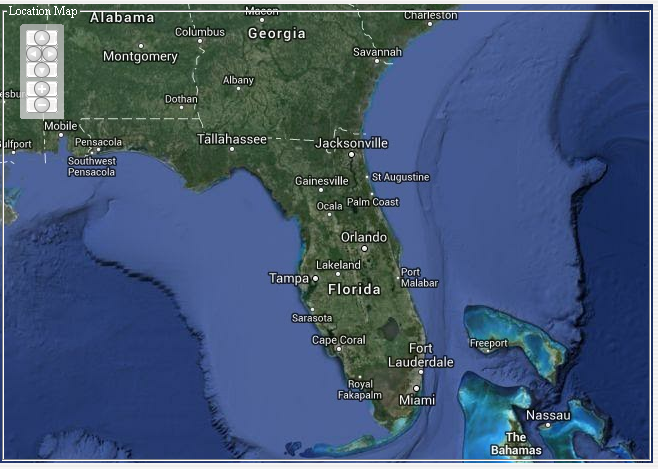


Old Version ⇨ New Version

(non-scrollable; non-zoomable) (Full zoom/scale operations)

Satellite imagery is also provided through Google Hybrid Maps and OpenMapStreet sources for improving landfill site selection:


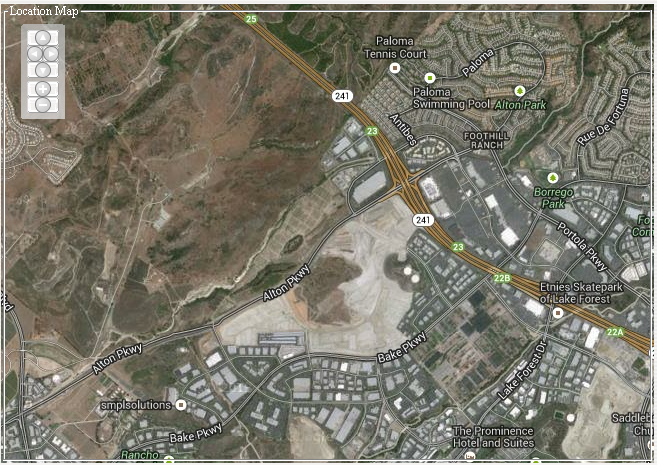


Other map tile server possibilities were also added to provide additional options with regard to level of detail displayed:


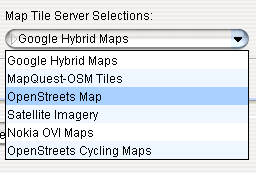


With the exception of the Google Hybrid Maps, these map tile features are based on OpenStreetMap, which is *open data*, licensed under the [Open Data Commons Open Database License](http://opendatacommons.org/licenses/odbl/) (ODbL). The cartography in our map tiles, and our documentation, are licensed under the [Creative Commons Attribution-ShareAlike 2.0](http://creativecommons.org/licenses/by-sa/2.0/) license (CC BY-SA). OpenStreetMap is “© OpenStreetMap contributors”. Map data is available under the Open Database License, and when using our map tiles, the cartography is licensed as CC BY-SA. (see [this copyright page](http://www.openstreetmap.org/copyright)). Although OpenStreetMap is open data, we cannot provide a free-of-charge map API for third-party developers. See their [API Usage Policy](http://wiki.openstreetmap.org/wiki/API_usage_policy), [Tile Usage Policy](http://wiki.openstreetmap.org/wiki/Tile_usage_policy) and [Nominatim Usage Policy](http://wiki.openstreetmap.org/wiki/Nominatim" \l "Usage_Policy). Contributors to OpenStreetMap include thousands of individuals.

We also include openly-licensed data from national mapping agencies and other sources, including:

- **Austria**: Contains data from [Stadt Wien](http://data.wien.gv.at/) (under [CC BY](http://creativecommons.org/licenses/by/3.0/at/deed.de)), [Land Vorarlberg](http://www.vorarlberg.at/vorarlberg/bauen_wohnen/bauen/vermessung_geoinformation/weitereinformationen/services/wmsdienste.htm) and Land Tirol (under [CC BY AT with amendments](http://www.tirol.gv.at/applikationen/e-government/data/nutzungsbedingungen/)).
- **Canada**: Contains data from GeoBase®, GeoGratis (© Department of Natural Resources Canada), CanVec (© Department of Natural Resources Canada), and StatCan (Geography Division, Statistics Canada).
- **France**: Contains data sourced from Direction Générale des Impôts.
- **Netherlands**: Contains © AND data, 2007 ([www.and.com](http://www.and.com/))
- **New Zealand**: Contains data sourced from Land Information New Zealand. Crown Copyright reserved.
- **South Africa**: Contains data sourced from [Chief Directorate: National Geo-Spatial Information](http://www.ngi.gov.za/), State copyright reserved.
- **United Kingdom**: Contains Ordnance Survey data © Crown copyright and database right 2010-12.

For further details of these and other sources used to improve OpenStreetMap, see the [Contributors page](http://wiki.openstreetmap.org/wiki/Contributors) on the OpenStreetMap Wiki. Inclusion of data in OpenStreetMap does not imply that the original data provider endorses OpenStreetMap, CALMIM or provides any warranty, or accepts any liability.

Other new features include the following:

- Added embedded conversions for S.I. units (i.e., site area in hectares), in addition to American units.
- Improved positioning of graphical buttons in site wizard screens.
- Improved data output to Microsoft Excel® compatible workbooks.
- Improved output directory for easier data retrieval.
- Added “Overview” file containing major information and results for each model run. See below for list of automatically-generated output files for each cover at each site:


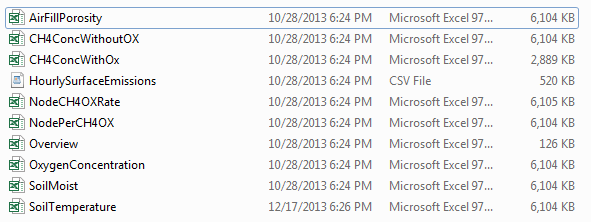


- Added on-line help (Microsoft-based HELP file).
- Added soil profile initialization step to minimize numeric error during initialization:

For numerical modeling, particularly for seasonal climatic effects, consistent initialization of differential algebraic equations (DAEs) can be difficult to achieve (Ascher and Petzold, 1998), in large part because the model starts out uninitialized (all variables = zero). For CALMIM, starting conditions such as soil temperature and moisture vary significantly from year-to-year and site-to-site. A further complication is the requirement that fixed algebraic constraints in numeric solutions for the DAEs are often difficult to satisfy with unknown starting values. In order to keep the number of required model input parameters to a minimum, a solution was needed for model initialization. However, discrete initialization steps have drawbacks: these steps in a numeric model can place a large burden on the computation time, often limiting the real-time simulation run time (Tummescheit and Eborn, 2002). Thus, largely to prevent the doubling of computation time, a pre-initialization run of CALMIM is automatically performed wherein the model uses hourly time steps (60 minutes rather than 10 minutes) to simulate soil temperature, moisture, and gas transport for each cover over a typical annual cycle. The ending values of this initialization run are then retained as the starting values for the “real” calculations. This method saved computation time while improving model initialization with minimal data, especially after the expansion of CALMIM beyond California sites to northern mid- and high-latitude sites with frozen January soils.

- Improved modeling of site-specific boundary conditions: fixed a bug which ignored user-entered boundary conditions if the stability criterion for numerical modeling was violated. This issue was also aided by the pre-initialization runs discussed above.
- Fixed bug in O2 transport routines to allow bidirectional transport [formerly only downward].

**SI. Text 3.** Historical Overview: Engineered Landfill Practices; Updating Measurement and Modeling Practices to Address Site-Specific and Cover-Specific Landfill CH4 Emissions.

Solid waste management has historically included diverse practices to prevent, recycle, reuse, control, manage, transport, and dispose of non-hazardous discards from households and commercial/industrial/mining/forestry activities. Globally, “landfilling” as a solid waste disposal practice can range from uncontrolled open dumpsites (without engineering design, construction, maintenance, and monitoring) to highly engineered facilities. See also discussion and figures in Meyer-Dombard et al. (2020).

Engineered landfills typically include the following components:

1. Staging of construction to include engineered “cells” with expansions to new cells proceeding both horizontally and vertically.

2. Construction of a basal impermeable liner [often HDPE] on the underlying geologic materials. This layer is overlain by coarse aggregate for collection of downward-infiltrating landfill liquids (“leachate”). Leachate is collected via sumps and periodically removed for external treatment.

3. Engineered diversion of surface precipitation and runoff from filling operations and completed slopes.

4. Routine use of cover soils [approved local daily, intermediate, and final cover soils; approved geomembrane composite designs; alternative designs using other approved materials].

5. Routine monitoring and control of landfill inputs; monitoring and control of both leachate and biogas associated with landfilling operations.

6. Engineered biogas collection and recovery using either vertical wells or horizontal collection systems.

Many developed and developing countries currently regulate landfill design, construction, operations, and liquid/gaseous emissions. In the U.S. and other countries, landfills have historically become larger, more prominent landscape features forming massive mounds >50 m high or valley fills >100 m deep. In many developing countries, the trend in recent decades has been toward more highly engineered and managed facilities [see also discussion in Meyer-Dombard et al. (2020).]

Historically, controlled landfilling practices accelerated in developing countries during the late 1990’s and early 2000’s under the Clean Development Mechanism (CDM) of the Kyoto Protocol when Certified Emission Reductions (CER’s; units of CO2 equivalents based on 100-year global warming potential for CH4) became available for landfill CH4 recovery projects in developing countries. Via negotiated financial and technical agreements, landfill CH4 recovery projects could be used to offset emissions for entities in developed countries with Kyoto compliance obligations. To be successful, landfill gas recovery CDM projects required engineered landfill sites, use of cover materials, and well-designed, constructed, and maintained biogas collection/recovery systems.

In parallel with increased international development of landfill CH4 recovery projects and increasing international interest in reducing CH4 emissions from landfills, a re-examination of historical IPCC methodologies and models for landfill CH4 generation and recovery has also occurred. This re-examination occurred simultaneously with a broad expansion of site-specific field measurements in the late 1990’s and early 2000’s for landfill CH4 emissions using a variety of techniques ranging from small chambers to micrometeorological approaches, tracer dispersion techniques, aircraft mass balance techniques, and recently, tall tower, aircraft and satellite imaging arrays. Recently, NASEM (2018) reviewed “top down” and “bottom up” approaches for improving U.S. anthropogenic CH4 emissions inventories. Major recommendations included the development of a national 0.1 X 0.1 deg. annual gridded U.S. inventory for individual CH4 sources and updating GHG inventory methodologies consistent with the latest science.

**SI Text S4.** General discussion of CALMIM output compared to IPCC (2006) and SEM methodologies.

As documented in previous literature, CALMIM can readily model thin covers or, indeed, any cover soil profile specified by the user (Cambaliza et al., 2017; Spokas et al., 2015). For a given scenario, however, it is not true that CALMIM-modeled results are typically “lower” than IPCC/GHGRP methods (an example of this is shown in Figure S5). Taken together, the “IPCC/GHGRP” methods result in a very wide range of estimated emissions, including various IPCC (2006) options and 3 different scenarios (HH-6, HH-7, HH-8) from the GHGRP alone. A major problem, however, is that all are based on an initial calculation for CH4 generation from the **waste-in-place**—this systematically results in estimated emissions that are higher for larger sites (higher WIP), which is not universally true. These shortcomings were previously discussed in NASEM (2018), Spokas et al. (2011), Spokas et al. (2015), and Cambaliza et al. (2017). It should be noted in Spokas et al. (2015), the total CALMIM-based 2010 emissions for California sites was similar to previous estimates provided by the California Air Resources Board using IPCC (2006) for the California state inventory with historical assumptions of 75% “recovery efficiency” and 10% oxidation. The site-specific results, however, can be very different and, going forward, are required for guiding local and regional mitigation decisions regarding multiple CH4 sources. For CALMIM modeling, the user specifies each cover area, the associated soil properties/texture profile, and the fraction of each cover area with gas recovery. Additionally, the user can also specify soil gas CH4 and O2 at the top (atmosphere) and bottom (base of cover/waste interface) of the profile, as well as annual weather data (daily min/max temp and daily precipitation). CALMIM then models diffusive CH4 emissions both with and without oxidation for 10 min. timesteps and 2.5 cm depth increments over an annual cycle. CALMIM also calculates average monthly emissions with and without oxidation, as well as an annual average, all with standard deviations.

The shortcomings of periodic surface emission monitoring (SEM) scans required by regulation are well known (Bel Hadj Ali et al., 2020): especially the lack of concurrent emissions quantification (only surface CH4 concentration) and lack of universal areal coverage at landfill sites. There is opportunity, however, for these methodologies to expand to steeper slopes and other areas not currently scanned due to both rapidly-evolving sensor technology (Martinez et al., 2020) and drone-mounted platforms (Bel Hadj Ali et al., 2020; Daugėla et al., 2020; Kim et al., 2021).

A significant shortcoming of the historic models is the general consideration of climate via the assignment of a kinetic constant for 1st order models for CH4 generation (Jain et al., 2021) coupled with lack of consideration of site-specific climate with respect to modeling cover-specific oxidation and “net” emissions. Realistically, both oxidation and emission rates on an area basis (g CH4 m-2 d-1) can vary by several orders of magnitude. Conversely, using CALMIM, site-specific and cover-specific soil gas CH4 transport, oxidation, and net emission rates inclusive of local climate are central to the modeling process within model constraints (0.5 deg lat/long; 10 min timesteps over an annual cycle).


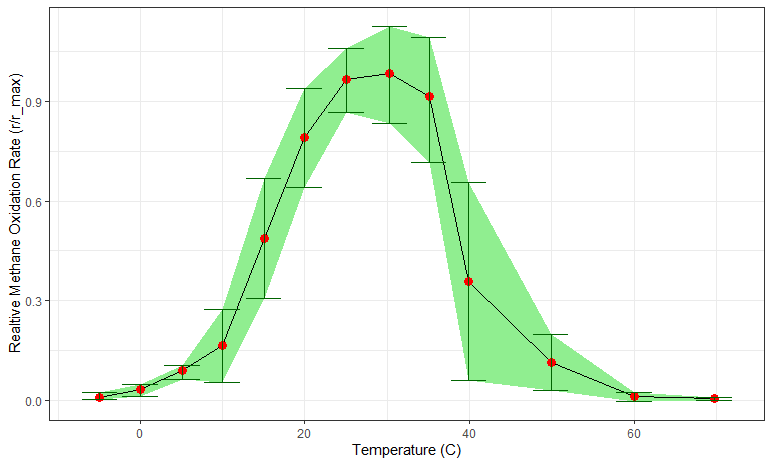


**Figure S1.** Effects of soil temperature on relative rates of CH4 oxidation [Figure adapted from Spokas and Bogner (2011)].


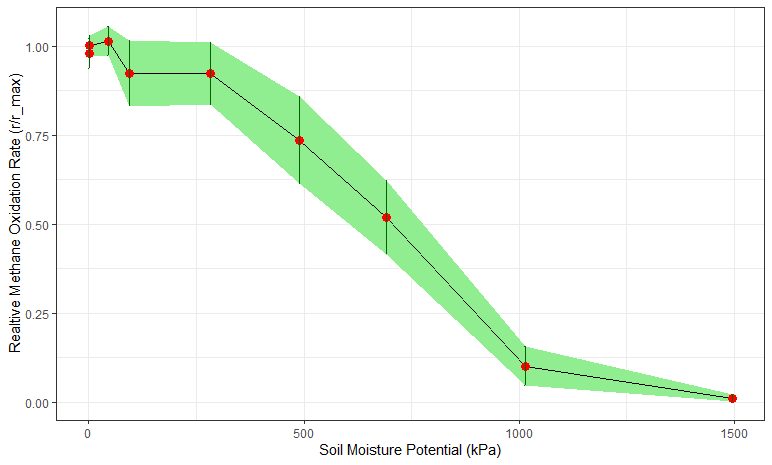


**Figure S2.** Effect of soil moisture potential on relative rates of CH4 oxidation as a function of soil temperature 5-40 oC [Figure adapted from Spokas and Bogner (2011)].

**Figure S3.** **Monthly measured and modeled CH4 emissions from a central IN landfill.** The TCA box and whisker plot has the following percentile values: box bottom: 25th, box top: 75th, whisker bottom: 10th, whisker top: 90th, and red line: median. The CALMIM modeled results {+ and – SD) are shown for two cases: with (light green) and without (orange) oxidation. Also shown are the AMB emissions estimates on 30 August 2012 and 03 July 2014. DOI: <https://doi.org/10.1525/elementa.145.f3> (Cambaliza et al., 2017)


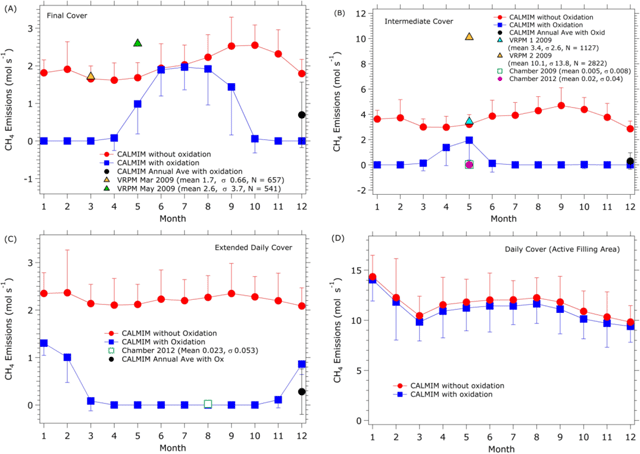


(E)

**
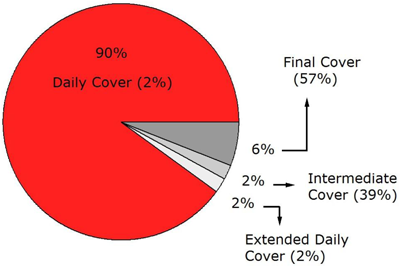
**

**Figure S4.** Measured and modeled average monthly CH4 emissions (mol s–1) for individual cover areas at a central Indiana landfill (Figure S3). (A) Final Cover (soil only, negligible emissions from final cover with geomembrane), (B) Intermediate Cover, (C) Extended Daily Cover, (D) Active Filling Area (thin overnight daily cover), and (E) the percentage value refers to the emissions contribution of each landfill cover while the corresponding fractional area footprint is provided inside the parenthesis. The daily cover CH4 emissions (11 ± 1.2 mol s–1) contribute > 90% to the total modeled landfill emissions rate (12 ± 2 mol s–1). This is attributable to the management practice of stripping a pre-existing intermediate cover (overlying fully methanogenic older waste) prior to vertical expansion for new cell development. DOI: <https://doi.org/10.1525/elementa.145.f4> from (Cambaliza et al., 2017).


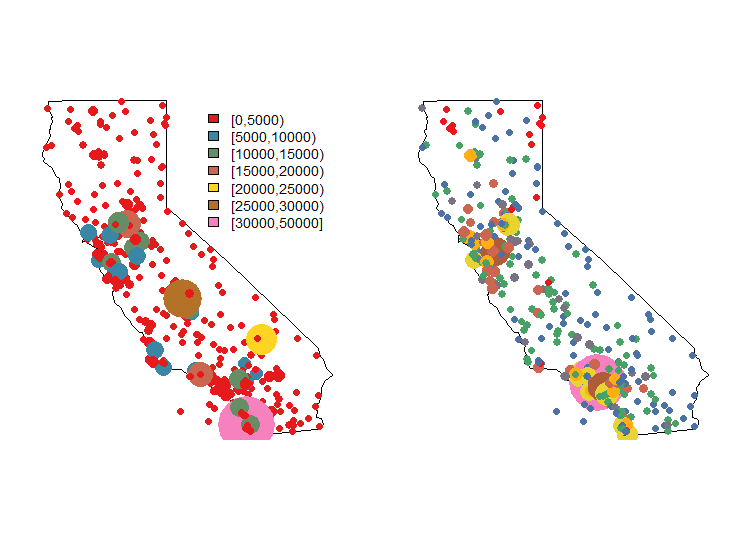


CALMIM 2010 Estimate: 337,430 kg CH4 yr-1 CARB 2010 Estimate: 301,748 kg CH4 yr-1

(A)

(B)


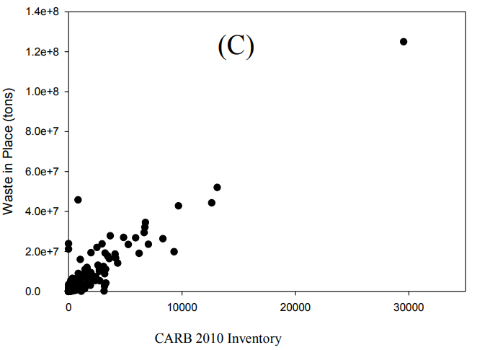


**Figure S5**. Spatial distribution for 2010 California landfill CH4 emissions estimates using

(A) CALMIM, using site cover and area data from Walker (2012) database and (B) IPCC (2006) with static assumptions of 10% soil oxidation and 75% “recovery efficiency” at sites with biogas extraction. Data from the California Air Resources Board (CARB). Despite the numeric similarity in the statewide emission totals, there are drastic differences in the distribution and individual site totals. All units are in kg CH4 yr-1. For (B), using IPCC (2006), the highest-emitting sites correlated with sites containing largest mass of waste. Using CALMIM (A), the highest-emitting sites were associated with large areas of thinner intermediate cover materials and lower seasonal methanotrophic soil oxidation (too hot/dry). Finally, (C) plot for modeled emissions vs. WIP from CARB 2010 inventory reporting. For additional details, see Bogner et al. (2014); Spokas et al. (2015).


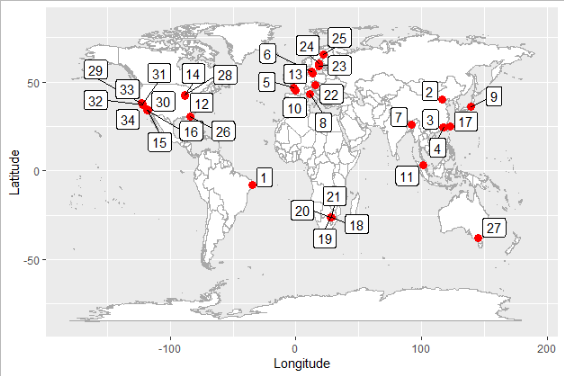


**Figure S6.** Locations for the 34 international sites for the landfill emission validation study. Locations are shown with a red dot and label.

A)


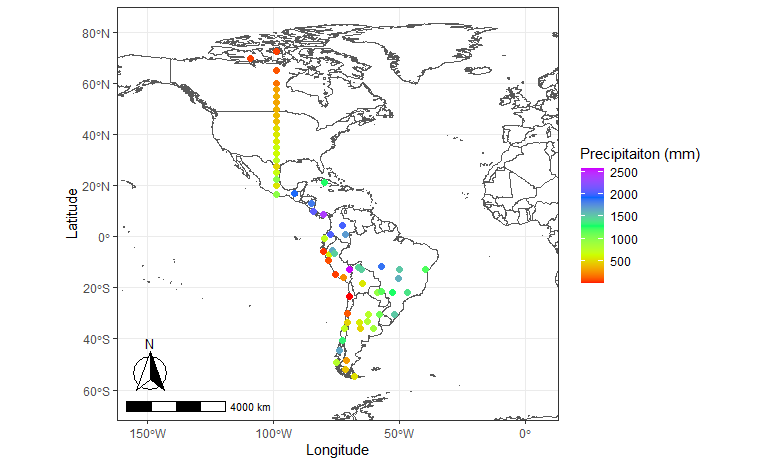


B)
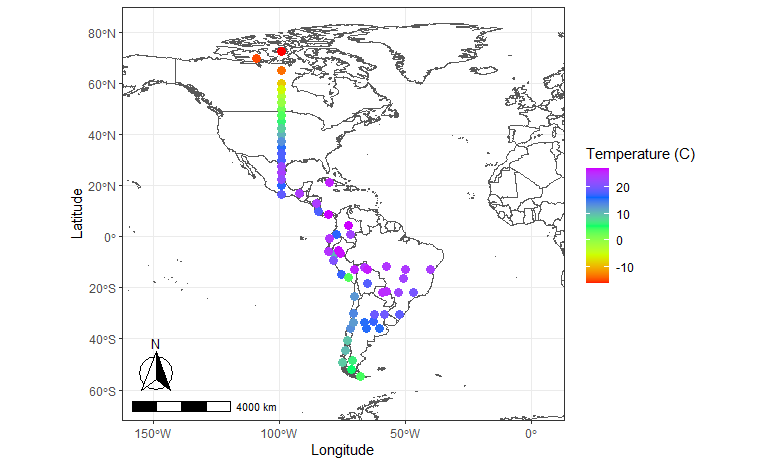


**Figure S7.** Visualization of the 61 sites utilized for the latitudinal gradient from -52o S to +70 o N across South and North America, which are color coded based on A) mean annual precipitation (MAP in mm) and B) mean annual temperature (MAT in oC).


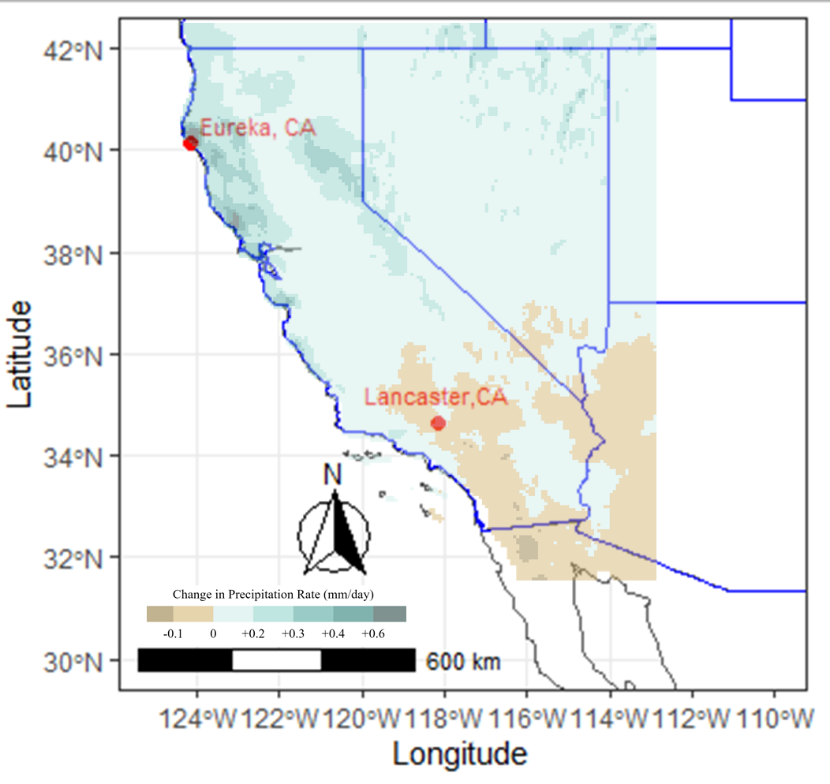


**Figure S8.** California locations with contrasting future climates (Site 1: Eureka and Site 2: Lancaster) selected for the CALMIM climate change scenario study. Figure shows projected alteration in precipitation for the time period 2070-2099 derived from CAL-ADAPT (https://cal-adapt.org/). See also discussion in text and Pierce et al. (2018).


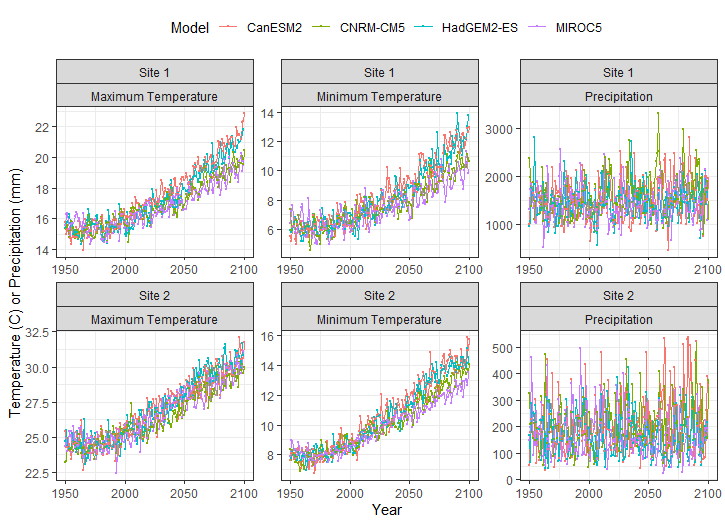


**Figure S9.** Predicted climate change model output for Site 1 (Eureka, CA) and Site 2 (Lancaster, CA) for the four climate models comprising the average climate change response for maximum and minimum temperatures and precipitation through the forecasted years: HadGEM2-ES [Met Office Hadley Centre for the CMIP5 centennial simulations; Warm/Drier], CNRM-CM5 [ESM developed jointly by CNRM-GAME (Météo-France/CNRS) and CERFACS; Cooler/Wetter], CanESM2 [second generation Canadian Earth System Model (CanESM2); Average], and MIROC5 [Model for Interdisciplinary Research On Climate-The University of Tokyo Center; Complement]. Note the relationship of maximum and minimum temperature with simulation year for both sites, and the lack of correlation with year and the precipitation forecasts for both sites.


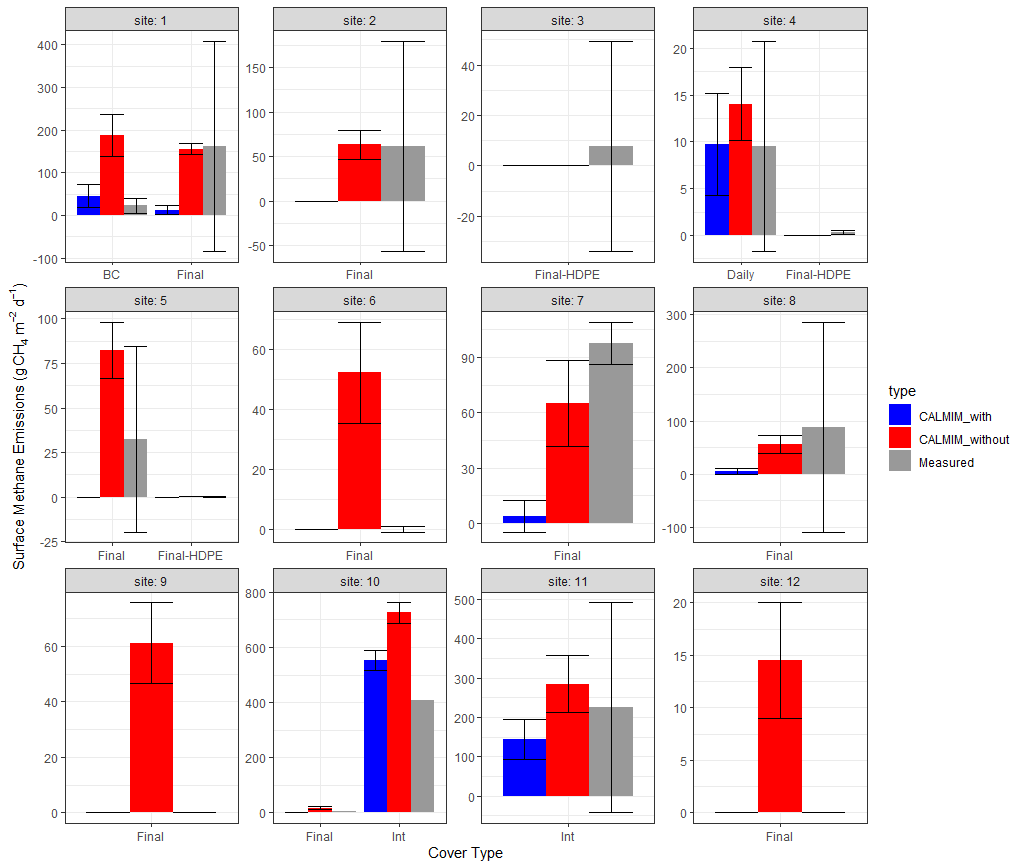


**Figure S10 (Part 1 of 3)** Comparison of the CALMIM model output for each validation site. Sites 1-12 shown in this figure. Blue bar indicates CH4 Emissions **WITH** soil oxidation. Red bar indicates CH4 Emissions **WITHOUT** soil oxidation. Gray bar indicates average of all field measurements. All values g CH4 m-2 d-1. See Figure S6 for site locations.


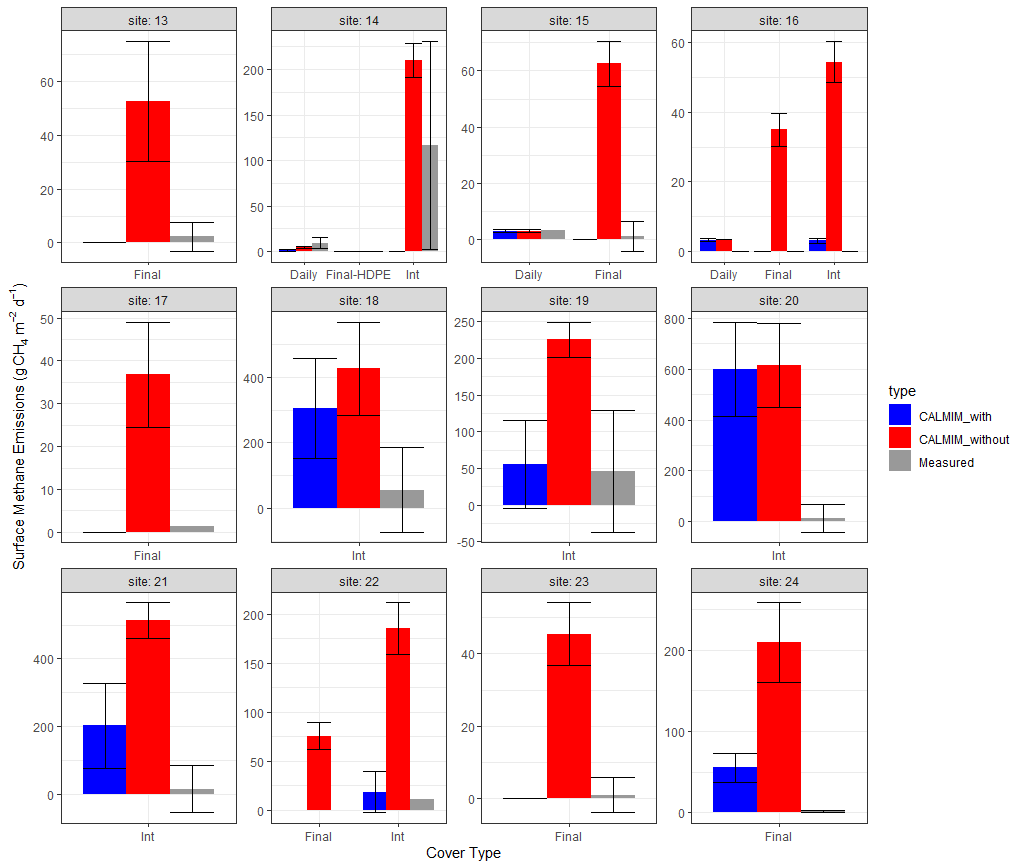


**Figure S10 (Part 2 of 3)** Comparison of the CALMIM model output for each validation site. Sites 1-12 shown in this figure. Blue bar indicates CH4 Emissions **WITH** soil oxidation. Red bar indicates CH4 Emissions **WITHOUT** soil oxidation. Gray bar indicates average of all field measurements. All values g CH4 m-2 d-1. See Figure S6 for site locations.


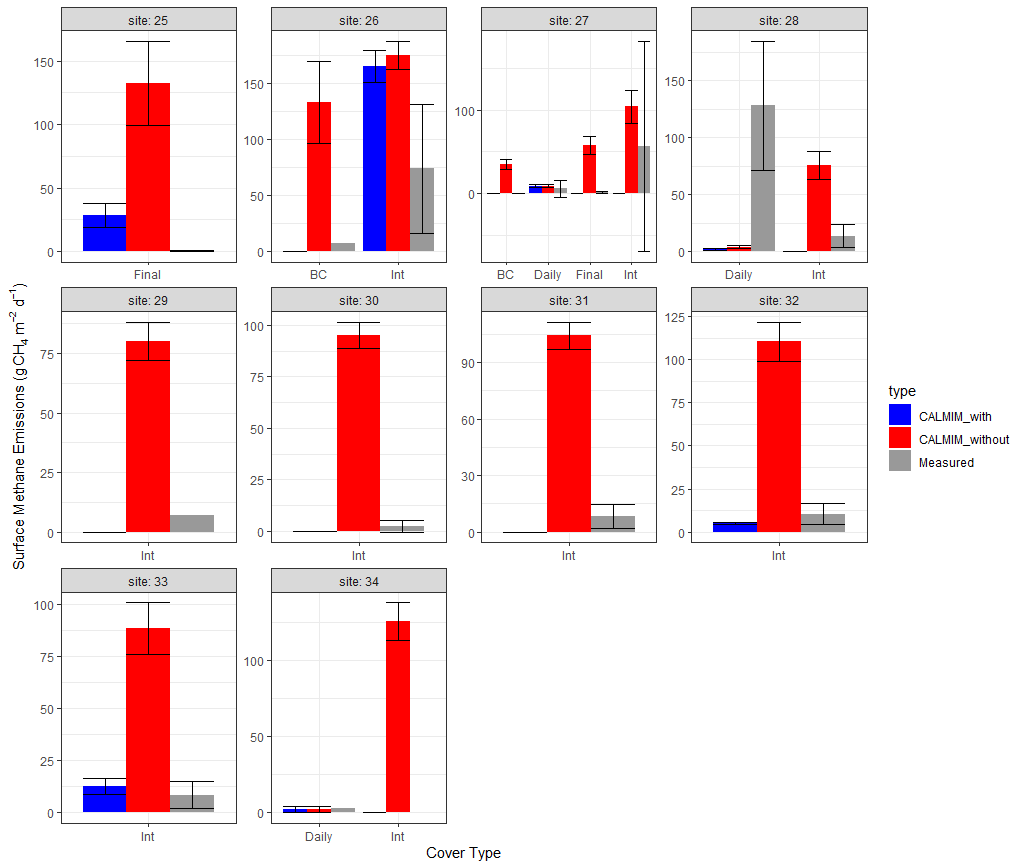


**Figure S10 (Part 3 of 3)** Comparison of the CALMIM model output for each validation site (Site 25-34 shown in this figure) with CH4 soil oxidation as the blue bar (g m-2 d-1), without CH4 oxidation in red (g m-2 d-1), and the average of all field measurements in gray (g m-2 d-1). The error bars illustrate the standard deviation of each assessment. The site locations are shown in Figure S9.


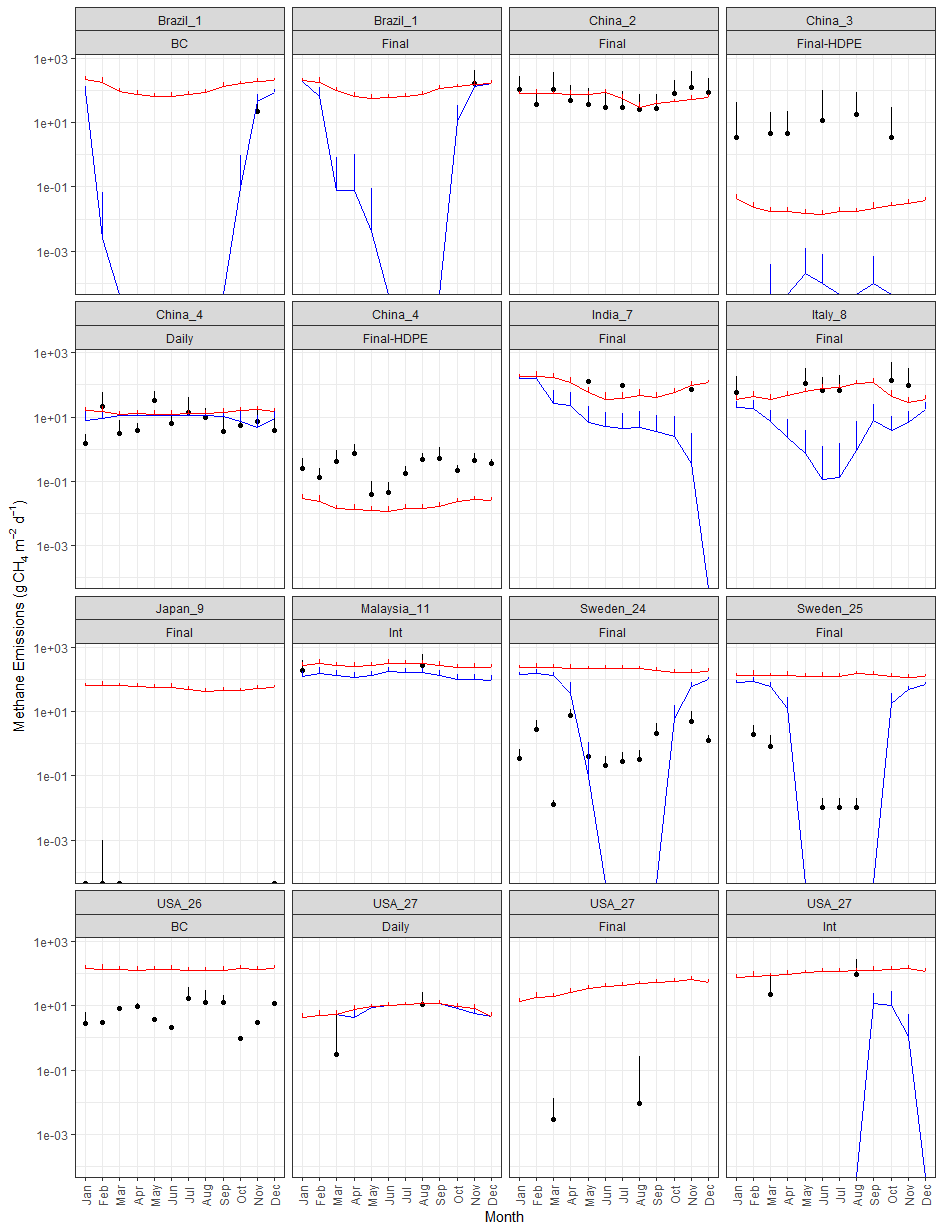


**Figure S11.** Comparison of average monthly field data for CH4 emissions [black circles + SD] from 11 global sites on 4 continents to: a) CALMIM-modeled average monthly CH4 emissions inclusive of soil oxidation (BLUE line + SD) and b) CALMIM-modeled average monthly emissions without oxidation (RED line + SD, “turned off” in CALMIM). The country and site number are given in each panel. [See also Table 1 for *all* field data; Figure S9 for *all* annual summarized data plots; Fig. S3 for a more detailed monthly comparison for one site.] Cover types include final cover, final cover with HDPE membrane, daily, intermediate (Int), and engineered biocovers (BC). All values g CH4 m-2 d-1. Note constant log scale and wide ranges for field values. Panels lacking blue lines had negligible CALMIM-modeled emissions with oxidation (zero values cannot be displayed on log-scale plot).

A)


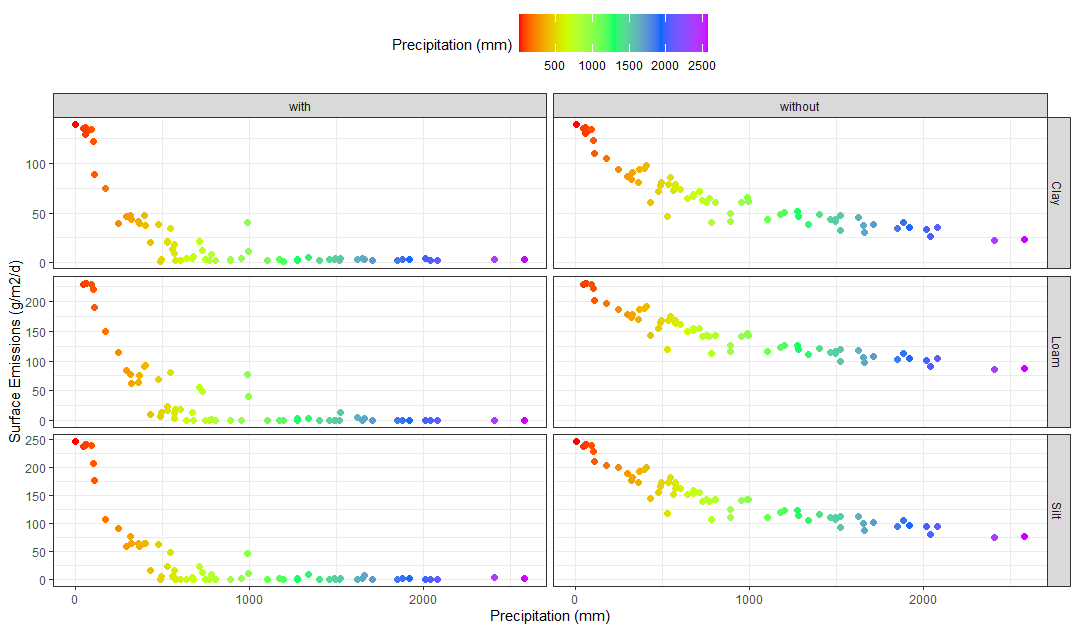


B)


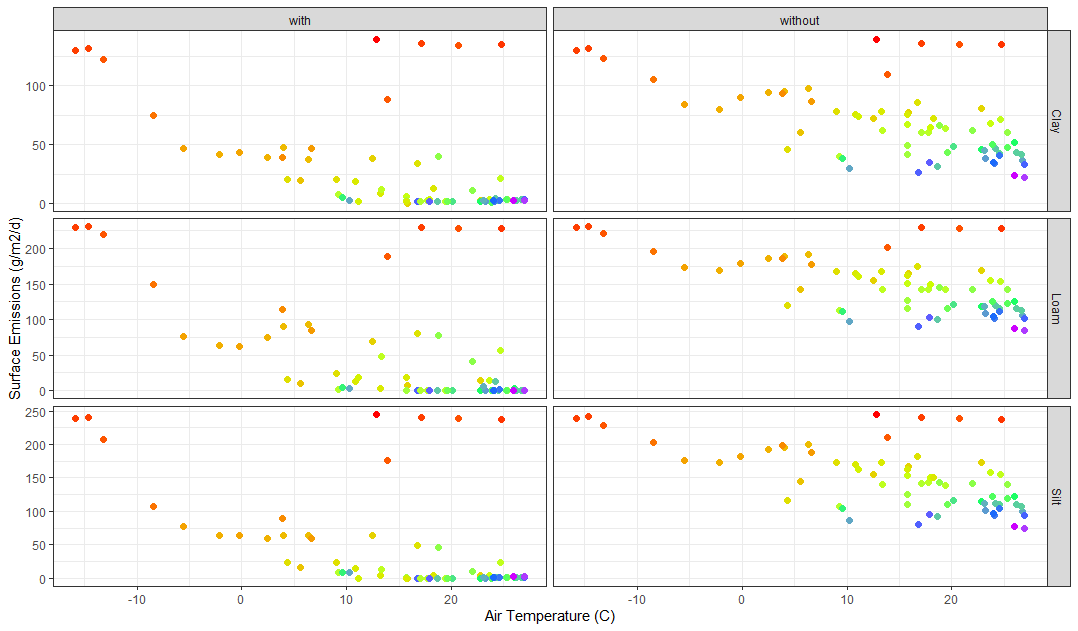


**Figure S12.** Comparisons between A) mean annual precipitation (MAP; mm) and B) mean annual temperature (MAT; oC) to modeled emissions “with” and “without” soil CH4 oxidation for the 1 m clay, loam, and silt final cover without landfill gas recovery (50% CH4 boundary condition at the base of cover) from latitudinal simulations. Note the stronger relationship with annual precipitation. Data points are colored according to annual precipitation (mm).


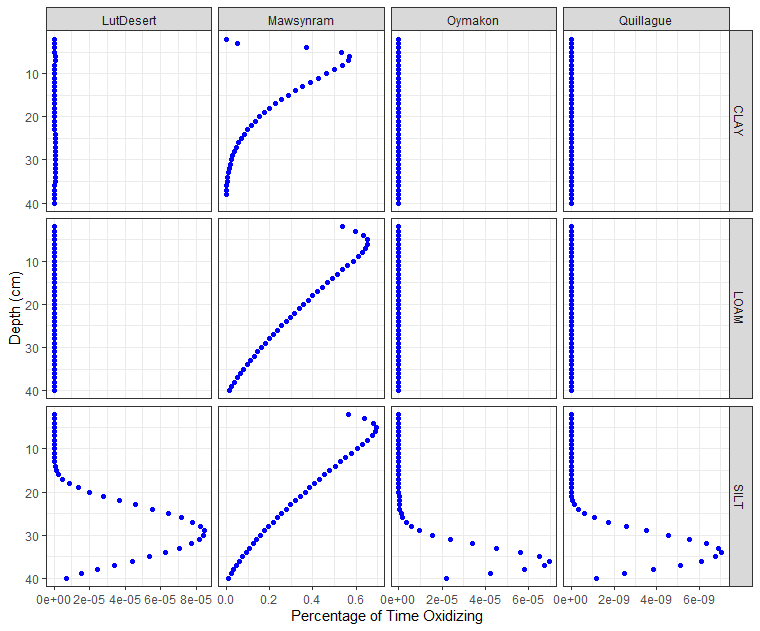


**Figure S13.** Percentage of time oxidizing (0-1; representing 0-100%) by depth (cm) and for three soil textures (clay, loam, and silt) at sites with extreme climate conditions: hottest (Lut Desert, Iran), wettest (Mawsynram, India), coldest (Oymakon, Siberia/Russia), driest (Quillague, Chile). Modeling relied on average climate data for each location assuming a 1 m final soil cover soil and 50% v/v soil gas CH4 at base of cover [no biogas extraction]. See Table 2 for average climatic data.


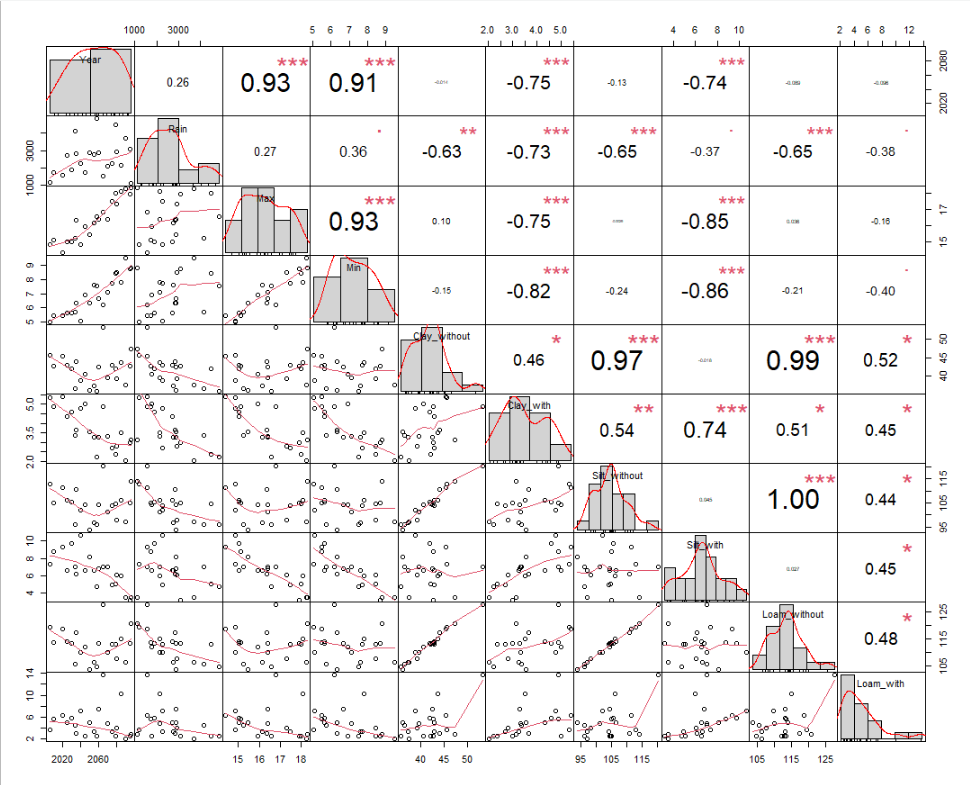


**Figure S14**. Correlation matrix for Site 1 (Eureka, CA) runs of climate change scenarios. Year is the year of the simulation, Max is the maximum temperature (oC), Min is the minimum temperature (oC), Rain is the annual precipitation (mm), clay-with is for a 1m clay final cover with methane oxidation, clay_without is for a 1m clay final cover without methane oxidation, Silt_with is for a 1m silt cover with methane oxidation, silt-without is a 1m silt textured final cover without methane oxidation, loam_with is a 1m loam textured final cover with methane oxidation, loam_without is for a 1m loam texture final cover without methane oxidation. The red asterisks give the statistical significance for the Pearson correlation coefficient (*** p<0.001; ** p<0.05, * p< 0.10; no star p>0.10). Final cover default assumes a 50% CH4 v/v soil gas boundary condition at the base of the cover [e.g., assumes NO biogas recovery].


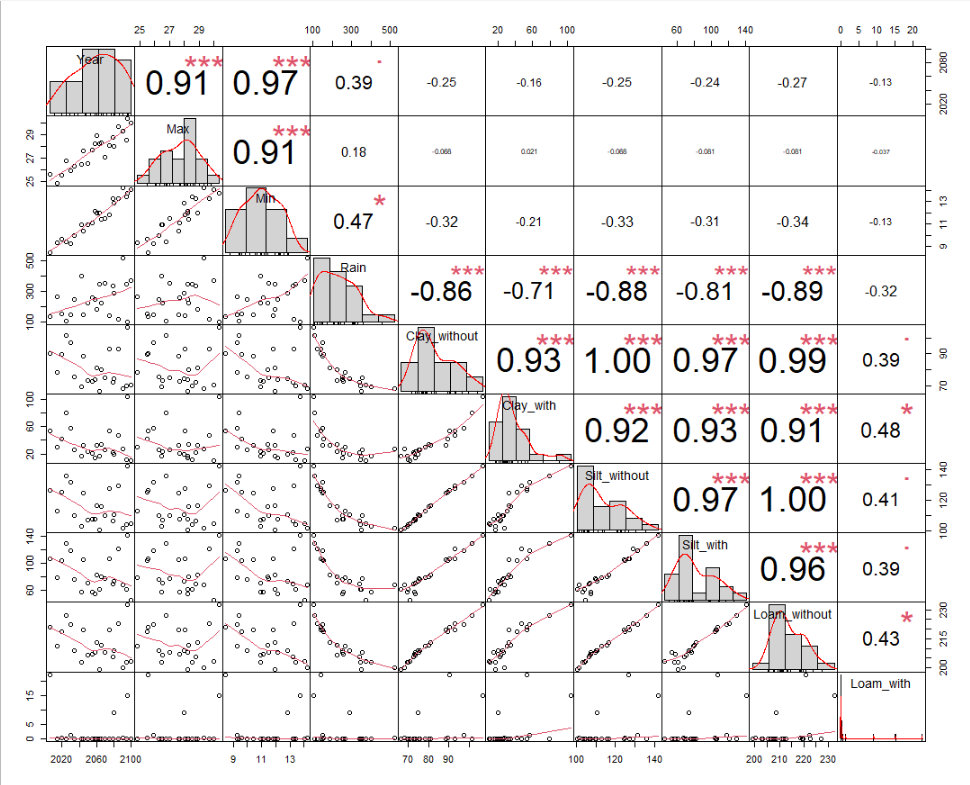


**Figure S15.** Correlation matrix visualization for Site 2 (Lancaster, CA) for climate change scenarios. Year is the year of the simulation, Max is the maximum temperature (oC), Min is the minimum temperature (oC), Rain is the annual precipitation (mm), clay-with is for a 1m clay final cover with methane oxidation, clay_without is for a 1m clay final cover without methane oxidation, Silt_with is for a 1m silt cover with methane oxidation, silt-without is a 1m silt textured final cover without methane oxidation, loam_with is a 1m loam textured final cover with methane oxidation, loam_without is for a 1m loam texture final cover without methane oxidation. The red asterisks give the statistical significance for the Pearson correlation coefficient (*** p<0.001; ** p<0.05, * p< 0.10; no star p>0.10). Final cover default assumes a 50% CH4 v/v soil gas boundary condition at the base of the cover [e.g., assumes NO biogas recovery].

**Table S1.** Overview of CALMIM input parameters, bundled models, and outputs (Spokas et al., 2011).

|  |  |  | **Description** | | **Value/Units/Reference** |
| --- | --- | --- | --- | --- | --- |
| **Model Inputs** | Site | | Latitude | | Decimal degrees (+N , -S) |
| Longitude | | Decimal degrees (-W, +E) |
| Waste Footprint | | Acres |
| Cover Characteristics |  | Coverage | | 0-100% of waste footprint |
| Organic Matter | | Low-high (0-5%) |
| Vegetation Presence | | 0-100% cover (slider bar)  Modifies incoming solar radiation  [Si = (1-Veg%)*Si] |
| Gas Recovery System | | 0-100% coverage (slider bar)  Reduces the lower methane concentration in default cover scenarios |
| Cover Type Selection | | | |
| Daily | Temperature | Upper | Air temperature simulation |
| Lower | 25 oC |
| CH4 | Upper | 2 ppmv |
| Lower | 0.3 % (v/v) |
| Oxygen | Upper | 20 % (v/v) |
| Lower | 5 % (v/v) |
| CH4 oxidation rate | | 400 µg CH4 gsoil-1d-1 |
| Intermediate | Temperature | Upper | Air temperature simulation |
|  | Lower | 35 oC |
| CH4 | Upper | 2 ppmv |
|  | Lower | 45 % (v/v) |
| Oxygen | Upper | 20 % (v/v) |
|  | Lower | 1 % (v/v) |
| CH4 oxidation rate | | 400 µg CH4 gsoil-1d-1 |
| Final | Temperature | Upper | Air temperature simulation |
|  | Lower | 40 oC |
| CH4 | Upper | 2 ppmv |
|  | Lower | 55 % (v/v) |
| Oxygen | Upper | 20 % (v/v) |
|  | Lower | 0 % (v/v) |
| CH4 oxidation rate | | 400 µg CH4 gsoil-1d-1 |
| Custom | User selectable boundary conditions | | |
| Layer Characteristics | Material | | Various materials (Table 2) |
| Thickness | | Variable: 2.5 cm to 2.5 m  (1 to 100”) |

**Table S1 (Continued)**

|  |  | **Description** | | **Value/Units/Reference** |
| --- | --- | --- | --- | --- |
| **Bundled Models** | GlobalTempSIM | Air temperature simulation | | (Spokas and Forcella, 2009) |
| GlobalRainSIM | Precipitation simulation | | (Spokas and Forcella, 2009) |
| SolarCalc | Solar radiation simulation | | (Spokas and Forcella, 2006) |
| STM2 | Soil temperature and moisture model | | (Spokas and Forcella, 2009) |
| Gas Diffusion | Oxygen and methane diffusion | | (Campbell, 1985) |
| **Model Outputs** | *Model outputs are written directly to Excel compatible files for each cover type* | | | |
| Daily Surface CH4 emissions | With oxidation | | g CH4 m-2d-1 |
| Without oxidation | | g CH4 m-2d-1 |
| Soil Nodes  (2.5 cm layer in cover) | Soil Temperature | | oC |
| Soil Moisture | | Volumetric (cm3 cm-3) |
| Air-filled porosity | | cm3 cm-3 |
| Oxygen Concentration | | % O2 |
| CH4  Concentration | With oxidation | % CH4 |
| Without oxidation | % CH4 |
| CH4 oxidation rate | | g CH4 m-2d-1 |
| CH4 oxidation percentage | | % |
| Bulk density | | g cm-3 |
| Fraction of time oxidizing | | 0 to 100% (0-1) |
| Simulated Weather Data | Maximum air temperature | | o C |
| Minimum air temperature | | o C |
| Precipitation | | Mm |

**Table S2.** Measured vs. CALMIM-modeled landfill CH4 emissions (g m-2 d-1) for the U.S. and international landfill sites used for the field validation. Comparison of field values to CALMIM annual average CH4 emissions (SD) for cover type.

| Ref | Site # | Country | Month | Method | Cover | n | Field Result | Average Model with Ox | Average Model without Ox | Result | Error with | Error without |
| --- | --- | --- | --- | --- | --- | --- | --- | --- | --- | --- | --- | --- |
| Maciel and Jucá (2011) | 1 | BR | 11 | Chamber | BC | 10 | 2.2 x 101 (1.9 x 101) | 45 (27) | 190 (49) | OVER | 23 | 170 |
| 1 | BR | 11 | Chamber | Final | 10 | 1.6 x 102 (2.5 x 102) | 12 (10) | 160 (13) |  | -150 | -6.2 |
| Li et al. (2020) | 2 | CN | 1 | Chamber | Final | 31 | 1.1 x 102 (1.7 x 102) | 0 (0) | 80 (15) |  | -110 | -29 |
| 2 | CN | 2 | Chamber | Final | 23 | 3.8 x 101 (5.3 x 101) | 0 (0) | 80 (30) |  | -38 | 42 |
| 2 | CN | 3 | Chamber | Final | 26 | 1.1 x 102 (2.5 x 102) | 0 (0) | 78 (15) |  | -110 | -28 |
| 2 | CN | 4 | Chamber | Final | 33 | 5.0 x 101 (9.3 x 101) | 0 (0) | 77 (20) |  | -50 | 26 |
| 2 | CN | 5 | Chamber | Final | 30 | 3.6 x 101 (7.8 x 101) | 0 (0) | 76 (14) |  | -36 | 40 |
| 2 | CN | 6 | Chamber | Final | 15 | 2.9 x 101 (7.4 x 101) | 0 (0) | 85 (25) |  | -29 | 57 |
| 2 | CN | 7 | Chamber | Final | 41 | 3.0 x 101 (6.3 x 101) | 0 (0) | 56 (18) |  | -30 | 25 |
| 2 | CN | 8 | Chamber | Final | 29 | 2.5 x 101 (4.7 x 101) | 0 (0) | 30 (12) |  | -25 | 4.9 |
| 2 | CN | 9 | Chamber | Final | 25 | 2.8 x 101 (4.8 x 101) | 0 (0) | 38 (11) |  | -28 | 10 |
| 2 | CN | 10 | Chamber | Final | 41 | 7.9 x 101 (1.2 x 102) | 0 (0) | 46 (9.0) |  | -79 | -34 |
| 2 | CN | 11 | Chamber | Final | 35 | 1.2 x 102 (2.6 x 102) | 0 (0) | 54 (15) |  | -120 | -6 |
| 2 | CN | 12 | Chamber | Final | 37 | 8.6 x 101 (1.5 x 102) | 0 (0) | 62 (11) |  | -86 | -24 |
|  | **2** | **CN** | **A** | **Chamber** | **Final** | **366** | **6.1 x 101 (3.6 x 101)** | 0 (0) | **63 (19)** |  | **-61** | **2.4** |
| Zhang et al. (2019) | 3 | CN | 1 | Chamber | Final-HDPE | 37 | 3.5 x 100 (3.7 x 101) | 0 (0) | 0.04 (0.02) |  | -3.5 | -3.5 |
| 3 | CN | 3 | Chamber | Final-HDPE | 37 | 4.6 x 100 (1.6 x 101) | 0 (0) | 0.02 (0.01) |  | -4.6 | -4.5 |
| 3 | CN | 4 | Chamber | Final-HDPE | 37 | 4.6 x 100 (1.8 x 101) | 0 (0) | 0.02 (0.01) |  | -4.6 | -4.5 |
|  | 3 | CN | 6 | Chamber | Final-HDPE | 37 | 1.2 x 101 (8.7 x 101) | 0 (0) | 0.01 (0.01) |  | -11.5 | -11.5 |
|  | 3 | CN | 8 | Chamber | Final-HDPE | 37 | 1.8 x 101 (6.6 x 101) | 0 (0) | 0.02 (0) |  | -18.5 | -18.5 |
|  | 3 | CN | 10 | Chamber | Final-HDPE | 37 | 3.4 x 101 (2.6 x 101) | 0 (0) | 0.03 (0.01) |  | -3.7 | -3.3 |
| Wang et al. (2017) | 4 | CN | 1 | Chamber | Daily | 2 | 1.5 x 100 (1.4 x 100) | 7.8 (7.0) | 16 (3.9) | OVER | 6.3 | 14 |
| 4 | CN | 2 | Chamber | Daily | 9 | 2.2 x 101 (3.6 x 101) | 9.2 (6.9) | 15 (6.5) |  | -13 | -6.8 |
| 4 | CN | 3 | Chamber | Daily | 4 | 3.1 x 100 (4.9 x 100) | 12 (3.7) | 12 (2.8) | OVER | 8.4 | 9.3 |
| 4 | CN | 4 | Chamber | Daily | 11 | 3.7 x 100 (2.4 x 100) | 11 (4.6) | 13 (3.9) | OVER | 7.6 | 8.8 |
| 4 | CN | 5 | Chamber | Daily | 5 | 3.4 x 101 (2.8 x 101) | 11 (3.9) | 12 (3.3) |  | -23 | -22 |
| 4 | CN | 6 | Chamber | Daily | 9 | 6.3 x 100 (4.8 x 100) | 11 (4.5) | 12 (4.1) |  | 4.7 | 6.0 |
| 4 | CN | 7 | Chamber | Daily | 7 | 1.3 x 101 (2.7 x 101) | 11 (4.7) | 13 (3.4) |  | -2.5 | -0.5 |
| 4 | CN | 8 | Chamber | Daily | 9 | 9.9 x 100 (8.1 x 100) | 11 (4.8) | 13 (3.5) |  | 1.3 | 3.2 |
| 4 | CN | 9 | Chamber | Daily | 7 | 3.6 x 100 (5.9 x 100) | 11 (5.5) | 14 (4.4) | OVER | 7.0 | 10 |
| 4 | CN | 10 | Chamber | Daily | 3 | 5.3 x 100 (2.4 x 100) | 7.5 (7.1) | 16 (3.3) |  | 2.2 | 11 |
| 4 | CN | 11 | Chamber | Daily | 6 | 7.3 x 100 (8.8 x 100) | 4.8 (6.4) | 17 (4.5) |  | -2.5 | 9.4 |
| 4 | CN | 12 | Chamber | Daily | 2 | 3.7 x 100 (5.0 x 100) | 9.0 (6.5) | 15 (3.1) | OVER | 5.3 | 11 |
|  | **CN** | **A** | **Chamber** | **Daily** | **74** | **9.5 x 100 (9.6 x 100)** | **9.7 (2.1)** | **14 (1.7)** |  | **0.2** | **4.5** |
| 4 | CN | 1 | Chamber | Final-HDPE | 3 | 2.5 x 10-1 (2.5 x 10-1) | 0 (0) | 0.03 (0.01) |  | -0.3 | -0.2 |
| 4 | CN | 2 | Chamber | Final-HDPE | 4 | 1.4 x 10-1 (1.2 x 10-1) | 0 (0) | 0.02 (0.01) |  | -0.14 | -0.11 |
| 4 | CN | 3 | Chamber | Final-HDPE | 5 | 4.2 x 10-1 (5.2 x 10-1) | 0 (0) | 0.01 (0) |  | -0.42 | -0.41 |
| 4 | CN | 4 | Chamber | Final-HDPE | 3 | 7.3 x 10-1 (6.4 x 10-1) | 0 (0) | 0.01 (0.01) | UNDER | -0.73 | -0.71 |
| 4 | CN | 5 | Chamber | Final-HDPE | 4 | 4.0 x 10-2 (6.0 x 10-2) | 0 (0) | 0.01 (0) |  | -0.04 | -0.03 |
|  | 4 | CN | 6 | Chamber | Final-HDPE | 4 | 5.0 x 10-2 (5.0 x 10-2) | 0 (0) | 0.01 (0) |  | -0.05 | -0.03 |
|  | 4 | CN | 7 | Chamber | Final-HDPE | 4 | 1.7 x 10-1 (1.1 x 10-1) | 0 (0) | 0.01 (0) | UNDER | -0.17 | -0.16 |
|  | 4 | CN | 8 | Chamber | Final-HDPE | 12 | 4.7 x 10-1 (2.5 x 10-1) | 0 (0) | 0.01 (0) | UNDER | -0.47 | -0.46 |
|  | 4 | CN | 9 | Chamber | Final-HDPE | 8 | 5.3 x 10-1 (6.4 x 10-1) | 0 (0) | 0.02 (0.01) |  | -0.53 | -0.51 |
|  | 4 | CN | 10 | Chamber | Final-HDPE | 4 | 2.2 x 10-1 (8.0 x 10-2) | 0 (0) | 0.02 (0) | UNDER | -0.22 | -0.20 |
|  | 4 | CN | 11 | Chamber | Final-HDPE | 5 | 4.3 x 10-1 (3.2 x 10-1) | 0 (0) | 0.03 (0.01) | UNDER | -0.43 | -0.40 |
|  | 4 | CN | 12 | Chamber | Final-HDPE | 5 | 3.5 x 10-1 (1.1 x 10-1) | 0 (0) | 0.03 (0) | UNDER | -0.35 | -0.32 |
|  |  | **CN** | **A** | **Chamber** | **Final-HDPE** | **61** | **3.2 x 10-1 (2.1 x 10-1)** | **0 (0)** | **0.02 (0.01)** | **UNDER** | **-0.32** | **-0.30** |
| Bogner et al. (2014) | 5 | FR |  | Chamber | Final-HDPE | 55 | -1.0 x 10-2 (1.0 x 10-1) | 0 (0.01) | 0.04 (0.01) |  | 0.01 | 0.05 |
| 5 | FR |  | Chamber | Final | 60 | 3.2 x 101 (5.2 x 101) | 0 (0) | 83 (16) |  | -32 | 50 |
| Bogner et al. (2014) | 6 | SE |  | Chamber | Final |  | 2.6 x 10-1 (1.0 x 100) | 0 (0.01) | 52 (17) |  | -0.26 | 52 |
| Gollapalli and Kota (2018) | 7 | IN | 5 | Chamber | Final | 44 | 1.2 x 102 (2.0 x 101) | 6.8 (15) | 58 (23) | UNDER | -120 | -66 |
| 7 | IN | 7 | Chamber | Final | 44 | 9.5 x 101 (7.9 x 100) | 4.4 (8.7) | 38 (19) | UNDER | -91 | -57 |
| 7 | IN | 11 | Chamber | Final | 44 | 7.4 x 101 (6.3 x 100) | 0.36 (2.7) | 99 (29) |  | -74 | 25 |
| Battaglini et al. (2013) | 8 | IT | 1 | Chamber | Final | 293 | 5.8 x 101 (1.3 x 102) | 20 (9.9) | 36 (11) |  | -38 | -22 |
| 8 | IT | 5 | Chamber | Final | 383 | 1.1 x 102 (2.2 x 102) | 0.71 (3.2) | 62 (13) |  | -110 | -49 |
| 8 | IT | 6 | Chamber | Final | 148 | 6.5 x 101 (1.1 x 102) | 0.12 (1.1) | 77 (25) |  | -65 | 12 |
| 8 | IT | 7 | Chamber | Final | 204 | 6.6 x 101 (1.3 x 102) | 0.13 (1.3) | 86 (20) |  | -66 | 19 |
|  | 8 | IT | 10 | Chamber | Final | 483 | 1.4 x 102 (3.6 x 102) | 3.7 (7.0) | 44 (21) |  | -130 | -93 |
|  | 8 | IT | 11 | Chamber | Final | 150 | 9.3 x 101 (2.4 x 102) | 6.9 (7.9) | 29 (11) |  | -86 | -64 |
| Izumoto et al. (2018) | 9 | JP | 1 | Chamber | Final | 5 | 0.0 x 100 (NA) | 0 (0) | 63 (12) |  | 0.0 | 63 |
| 9 | JP | 2 | Chamber | Final | 11 | 0.0 x 100 (NA) | 0 (0) | 64 (24) |  | 0.0 | 64 |
| 9 | JP | 3 | Chamber | Final | 10 | 0.0 x 100 (NA) | 0 (0) | 63 (12) |  | 0.0 | 63 |
|  | 9 | JP | 12 | Chamber | Final | 2 | 0.0 x 100 (NA) | 0 (0) | 55 (10) |  | 0.0 | 55 |
| Bogner et al. (2014) | 10 | FR | 7 | Chamber | Int | 12 | 8.6 x 102 (NA) | 550 (37) | 730 (37) | OVER | 470 | 640 |
| 10 | FR | 7 | Chamber | Int | 12 | 1.1 x 103 (NA) | 550 (37) | 730 (37) | UNDER | -530 | -360 |
| 10 | FR | 7 | Tracer | Int | 12 | 5.1 x 101 (NA) | 550 (37) | 730 (37) | OVER | 500 | 674 |
| 10 | FR | 7 | Chamber | Final | 12 | 2.0 x 100 (NA) | 0 (0) | 35 (6.3) |  | -2.0 | 33 |
|  | 10 | FR | 7 | Chamber | Final | 12 | 2.0 x 100 (NA) | 0 (0) | 8.2 (2.2) |  | -2.0 | 6.2 |
|  | 10 | FR | 7 | Chamber | Final | 12 | 8.4 x 100 (NA) | 0 (0) | 35 (6.3) |  | -8.4 | 27 |
|  | 10 | FR | 7 | Chamber | Final | 12 | 8.4 x 100 (NA) | 0 (0) | 8.2 (2.2) | UNDER | -8.4 | -0.2 |
|  | 10 | FR | 12 | Chamber | Final | 12 | 1.6 x 100 (7.8 x 10-1) | 0 (0) | 4 (2.1) |  | -1.6 | 2.4 |
|  | 10 | FR | 12 | Chamber | Final | 12 | 1.6 x 100 (7.8 x 10-1) | 0 (0) | 16 (5.4) |  | -1.6 | 14 |
| Abushammala et al. (2016) | 11 | MY | 1 | Chamber | Int | 81 | 1.8 x 102 (2.0 x 102) | 130 (51) | 270 (74) |  | -56 | 87 |
| 11 | MY | 8 | Chamber | Int | 81 | 2.7 x 102 (3.3 x 102) | 160 (52) | 300 (71) |  | -110 | 34 |
| Bogner et al. (2014) | 12 | US |  | Chamber | Final | 22 | 0.0 x 100 (NA) | 0 (0) | 25 (11) |  | 0.0 | 25 |
| 12 | US |  | Chamber | Final | 22 | 0.0 x 100 (NA) | 0 (0) | 7.4 (1) |  | 0.0 | 7.4 |
| 12 | US |  | Chamber | Final | 25 | 0.0 x 100 (NA) | 0 (0) | 25 (11) |  | 0.0 | 25 |
|  | 12 | US |  | Chamber | Final | 25 | 0.0 x 100 (NA) | 0 (0) | 0 (0) |  | 0.0 | 0.0 |
| Bogner et al. (2014) | 13 | US |  | Chamber | Final |  | 2.2 x 100 (5.4 x 100) | 0 (0) | 53 (22) |  | -2.2 | 50 |
| Bogner et al. (2014) | 14 | US |  | Chamber | Daily |  | 9.3 X 100 (6.2 x 100) | 1.2 (0.6) | 4.2 (1.2) |  | -8 | -5 |
| 14 | US |  | Chamber | Final-HDPE |  | 1.0 X 10-2 (1.0 X 10-2) | 0 (0) | 0.04 (0.01) |  | -0.01 | 0.03 |
| 14 | US |  | Chamber | Int |  | 1.2 X 10+2 (1.1 X 10+2) | 0 (0) | 210 (19) |  | -120 | 94 |
| Bogner et al. (2014) | 15 | US |  | Chamber | Daily | 14 | 3.2 X 10+0 (NA) | 3 (0.4) | 3 (0.4) | UNDER | -0.2 | -0.2 |
| 15 | US |  | Chamber | Final | 51 | 1.1 X 10+0 (5.4 X 10+0) | 0 (0) | 63 (8) |  | -1.1 | 61 |
| Bogner et al. (2014) | 16 | US | 7 | Chamber | Daily | 215 | 2.0 X 10-2 (2.0 X 10-2) | 0.01 (0) | 0.01 (0) |  | -0.01 | -0.01 |
| 16 | US | 7 | Chamber | Daily | 215 | 2.0 X 10-2 (2.0 X 10-2) | 5.3 (0.2) | 5.5 (0.1) | OVER | 5.2 | 5.5 |
| 16 | US | 3 | Chamber | Daily | 220 | 5.0 X 10-2 (5.0 X 10-2) | 0.01 (0) | 0.01 (0) |  | -0.03 | -0.03 |
|  | 16 | US | 3 | Chamber | Daily | 220 | 5.0 X 10-2 (5.0 X 10-2) | 7.9 (1.2) | 8.5 (0.1) | OVER | 7.9 | 8.5 |
|  | 16 | US | 7 | Chamber | Final | 234 | 1.0 X 10-2 (1.0 X 10-2) | 0 (0) | 33 (3.3) |  | -0.01 | 33 |
|  | 16 | US | 7 | Chamber | Final | 234 | 1.0 X 10-2 (1.0 X 10-2) | 0 (0) | 52 (8.4) |  | -0.01 | 52 |
|  | 16 | US | 3 | Chamber | Final | 233 | 0.0 X 100 (2.0 X 10-1) | 0 (0) | 33 (3.3) |  | 0.0 | 33 |
|  | 16 | US | 3 | Chamber | Final | 233 | 0.0 X 100 (2.0 X 10-1) | 0 (0) | 22 (4.2) |  | 0.0 | 22 |
|  | 16 | US | 7 | Chamber | Int | 244 | 1.0 X 10-2 (1.0 X 10-1) | 0 (0) | 0 (0) |  | -0.01 | -0.01 |
|  | 16 | US | 7 | Chamber | Int | 244 | 1.0 X 10-2 (1.0 X 10-1) | 12.4 (2.6) | 120 (11) | OVER | 12 | 120 |
|  | 16 | US | 3 | Chamber | Int | 260 | 0.0 X 10+0 (1.0 X 10-1) | 0 (0) | 0 (0) | OVER | 0.0 | 0.0 |
|  | 16 | US | 3 | Chamber | Int | 260 | 0.0 X 10+0 (1.0 X 10-1) | 0 (0) | 95 (12.4) |  | 0.0 | 95 |
| Bogner et al. (2014) | 17 | TW |  | Chamber | Final |  | 3.2 X 10-1 (NA) | 0 (0) | 52 (14.1) |  | -0.3 | 52 |
| 17 | TW |  | Chamber | Final |  | 3.8 X 10+0 (NA) | 0 (0) | 26 (10.4) |  | -3.8 | 22 |
|  | 17 | TW |  | Chamber | Final |  | 2.0 X 10-2 (NA) | 0 (0) | 32 (12.4) |  | -0.02 | 32 |
| Bogner et al. (2014) | 18 | ZA |  | Chamber | Int | 40 | 5.7 X 10+1 (1.3 X 10+2) | 310 (150) | 430 (140) | OVER | 250 | 370 |
| Bogner et al. (2014) | 19 | ZA |  | Chamber | Int | 46 | 4.6 X 10+1 (8.3 X 10+1) | 55 (60) | 230 (24) |  | 8.9 | 179 |
| Bogner et al. (2014) | 20 | ZA |  | Chamber | Int | 43 | 1.3 X 10+1 (5.5 X 10+1) | 600 (190) | 620 (170) | OVER | 590 | 600 |
| Bogner et al. (2014) | 21 | ZA |  | Chamber | Int | 32 | 1.6 X 10+1 (7.1 X 10+1) | 200(130) | 510 (53) | OVER | 187 | 497 |
| Bogner et al. (2014) | 22 | AU |  | Chamber | Final | 5 | 1.0 X 10-1 (NA) | 0 (0.1) | 81 (15) |  | -0.1 | 81 |
| 22 | AU |  | Chamber | Final | 5 | 6.0 X 10-1 (NA) | 0 (0) | 70 (12) |  | -0.6 | 70 |
| 22 | AU |  | Chamber | Int | 5 | 1.3 X 10+1 (NA) | 25 (32) | 250 (37) | OVER | 12 | 240 |
|  | 22 | AU |  | Chamber | Int | 5 | 1.0 X 10+1 (NA) | 12 (10) | 120 (16) | OVER | 1.6 | 110 |
| Bogner et al. (2014) | 23 | SE | A | Chamber | Final |  | 9.6 X 10-1 (NA) | 0 (0) | 46 (8.6) |  | -1.0 | 45 |
| Börjesson and Svensson (1997) | 24 | SE | 1 | Chamber | Final | 4 | 3.4 X 10-1 (3.4 X 10-1) | 140 (28) | 230 (41) | OVER | 140 | 220 |
| 24 | SE | 2 | Chamber | Final | 4 | 2.7 X 100 (2.6 X 100) | 150 (56) | 230 (87) | OVER | 144 | 230 |
| 24 | SE | 3 | Chamber | Final | 4 | 1.0 X 10-2 (NA) | 130 (29) | 240 (43) | OVER | 130 | 240 |
| 24 | SE | 4 | Chamber | Final | 4 | 7.7 X 100 (3.9 X 100) | 36 (42) | 220 (59) | OVER | 28 | 210 |
| 24 | SE | 5 | Chamber | Final | 12 | 3.9 X 10-1 (2.5 X 10-1) | 0.1 (0.97) | 210 (42) |  | -0.3 | 210 |
| 24 | SE | 6 | Chamber | Final | 12 | 2.1 X 10-1 (1.8 X 10-1) | 0 (0) | 210 (59) |  | -0.2 | 210 |
| 24 | SE | 7 | Chamber | Final | 12 | 2.7 X 10-1 (2.5 X 10-1) | 0 (0) | 220 (43) |  | -0.3 | 220 |
| 24 | SE | 8 | Chamber | Final | 4 | 3.1 X 10-1 (3.1 X 10-1) | 0 (0) | 210 (41) |  | -0.3 | 210 |
| 24 | SE | 9 | Chamber | Final | 8 | 2.1 X 100 (2.0 X 100) | 0 (0) | 190 (49) |  | -2.1 | 190 |
| 24 | SE | 11 | Chamber | Final | 4 | 5.0 X 100 (4.7 X 100) | 59 (21) | 160 (42) | OVER | 54 | 160 |
| 24 | SE | 12 | Chamber | Final | 4 | 1.2 X 100 (5.3 X 10-1) | 97 (19) | 180 (33) | OVER | 96 | 180 |
|  | 24 | **SE** | **A** | **Chamber** | **Final** | **72** | 1.8 X 100 (2.5 X 100) | **56 (63)** | **209 (23)** | **OVER** | **54** | **210** |
| Maurice and Lagerkvist (2003) | 25 | SE | 2 | Chamber | Final | 12 | 2.0 X 100 (1.6 X 100) | 83 (31) | 130 (50) | OVER | 81 | 130 |
| 25 | SE | 3 | Chamber | Final | 9 | 7.8 X 10-1 (9.8 X 10-1) | 60 (17) | 130 (24) | OVER | 59 | 130 |
| 25 | SE | 6 | Chamber | Final |  | 1.0 X 10-2 (1.0 X 10-2) | 0 (0) | 120 (35) |  | -0.01 | 120 |
|  | 25 | SE | 7 | Chamber | Final |  | 1.0 X 10-2 (1.0 X 10-2) | 0 (0) | 130 (26) |  | -0.01 | 130 |
|  | 25 | SE | 8 | Chamber | Final |  | 1.0 X 10-2 (1.0 X 10-2) | 0 (0) | 150 (31) |  | -0.01 | 150 |
| Bogner et al. (2014) | 26 | US | A | Chamber | Int | 17 | 7.4 X 10+1 (5.7 X 10+1) | 165 (14) | 180 (12) | OVER | 92 | 100 |
| Bogner et al. (2014) | 27 | AT | A | Chamber | BC | 29 | 1.0 X 10-2 (2.0 X 10-2) | 0.1 (0.5) | 70 (12) | OVER | 0.09 | 70 |
| 27 | AT | A | Chamber | BC | 29 | 1.0 X 10-2 (2.0 X 10-2) | 0 (0) | 0.25 (0.05) |  | -0.01 | 0.2 |
| 27 | AT | A | Chamber | Final | 29 | 3.2 X 100 (2.4 X 100) | 0 (0) | 110 (18) |  | -3.2 | 100 |
| Bogner et al. (2014) | 26 | US | 1 | Chamber | BC | 2 | 2.9 X 100 (3.5 X 100) | 0 (0) | 140 (34) |  | -2.9 | 140 |
| 26 | US | 2 | Chamber | BC | 1 | 3.1 X 100 (NA) | 0 (0) | 130 (55) |  | -3.1 | 130 |
| 26 | US | 3 | Chamber | BC | 1 | 8.0 X 100 (NA) | 0 (0) | 140 (31) |  | -8.0 | 130 |
|  | 26 | US | 4 | Chamber | BC | 2 | 9.3 X 100 (2.7 X 100) | 0 (0) | 120 (39) |  | -9.3 | 120 |
|  | 26 | US | 5 | Chamber | BC | 1 | 3.7 X 100 (NA) | 0 (0) | 130 (32) |  | -3.7 | 130 |
|  | 26 | US | 6 | Chamber | BC | 1 | 2.2 X 100 (NA) | 0 (0) | 130 (42) |  | -2.2 | 130 |
|  | 26 | US | 7 | Chamber | BC | 3 | 1.7 X 10+1 (2.0 X 10+1) | 0 (0) | 130 (32) |  | -17 | 110 |
|  | 26 | US | 8 | Chamber | BC | 2 | 1.3 X 10+1 (1.6 X 10+1) | 0 (0) | 120 (31) |  | -13 | 110 |
|  | 26 | US | 9 | Chamber | BC | 2 | 1.2 X 10+1 (9.0 X 100) | 0 (0) | 130 (38) |  | -12 | 110 |
|  | 26 | US | 10 | Chamber | BC | 1 | 9.6 X 10-1 (NA) | 0 (0) | 140 (33) |  | -0.96 | 140 |
|  | 26 | US | 11 | Chamber | BC | 1 | 3.1 X 100 (NA) | 0 (0) | 130 (38) |  | -3.1 | 131 |
|  | 26 | US | 12 | Chamber | BC | 1 | 1.1 X 10+1 (NA) | 0 (0) | 140 (32) |  | -11 | 130 |
|  | 26 | US | **A** | **Chamber** | **BC** | **18** | 7.3 X 100 (5.3 X 100) | **0 (0)** | **130 (7.0)** |  | **-7.3** | **130** |
| Bogner et al. (2014) | 27 | US | 3 | Chamber | Daily |  | 3.0 X 10-1 (5.6 X 100) | 5.5 (1.7) | 5.5 (1.7) |  | 5.2 | 5.2 |
| 27 | US | 8 | Chamber | Daily |  | 1.1 X 10+1 (1.5 X 10+1) | 12 (2.1) | 12 (2.1) |  | 0.9 | 0.9 |
| 27 | US | 3 | Chamber | Final |  | 0.0 X 100 (1.0 X 10-2) | 0 (0) | 19 (5.2) |  | 0.0 | 19 |
| 27 | US | 8 | Chamber | Final |  | 1.0 X 10-2 (2.5 X 10-1) | 0 (0) | 48 (8.8) |  | -0.01 | 48 |
| 27 | US | 3 | Chamber | Int |  | 2.2 X 10+1 | 0 (0) | 85 (17) |  | -22 | 63 |
|  | 27 | US | 8 | Chamber | Int |  | 9.1 X 10+1 | 0 (0) | 120 (23) |  | -91 | 32 |
| Bogner et al. (2014) | 28 | US | A | Chamber | Daily |  | 3.8 X 10+2 | 1.7 (0.8) | 4 (1.2) | UNDER | -380 | -380 |
| 28 | US | A | Chamber | Daily |  | 1.7 X 100 | 1.7 (0.8) | 4 (1.2) |  | -0.04 | 2.3 |
| 28 | US | A | Chamber | Daily |  | 1.0 X 10-2 | 1.7 (0.8) | 4 (1.2) | OVER | 1.7 | 4.0 |
|  | 28 | US | A | Chamber | Int |  | 1.3 X 10+1 | 0 (0) | 75 (12) |  | -13 | 62 |
| Bogner et al. (2014) | 29 | US | 2 | Chamber | Int | 18 | 3.5 X 100 | 0 (0) | 75 (5.6) |  | -3.5 | 72 |
| 29 | US | 2 | VRPM | Int | 296 | 1.0 X 10+1 | 0 (0) | 75 (5.6) |  | -10 | 65 |
| 29 | US | 6 | Chamber | Int | 46 | 8.1 X 100 | 0 (0) | 83 (9.3) |  | -8.1 | 74 |
| 29 | US | 6 | VRPM | Int | 341 | 6.0 X 100 | 0 (0) | 83 (9.3) |  | -6.0 | 76 |
|  | 29 | US | 6 | VRPM | Int | 402 | 8.2 X 100 | 0 (0) | 83 (9.3) |  | -8.2 | 74 |
|  | 29 | US | 6 | Chamber | Int | 1 | 6.8 X 100 | 0 (0) | 83 (9.3) |  | -6.8 | 76 |
| Bogner et al. (2014) | 30 | US | 1 | VRPM | Int | 216 | 4.0 X 100 | 0 (0) | 95 (6.5) |  | -4.0 | 91 |
| 30 | US | 9 | VRPM | Int | 179 | 9.0 X 10-1 | 0 (0) | 95 (6.5) |  | -0.9 | 94 |
| Bogner et al. (2014) | 31 | US | 10 | Chamber | Int | 7 | 7.5 X 10-1 | 0 (0) | 110 (6.5) |  | -0.8 | 110 |
| 31 | US | 10 | VRPM | Int | 598 | 9.5 X 100 | 0 (0) | 110 (6.5) |  | -9.5 | 100 |
| 31 | US | 6 | VRPM | Int | 635 | 1.4 X 10+1 | 0 (0) | 92 (8.4) |  | -14 | 78 |
| Bogner et al. (2014) | 32 | US | 1 | Chamber | Int | 23 | 0.0 X 100 | 0 (0) | 100 (12) |  | 0.0 | 100 |
| 32 | US | 1 | VRPM | Int | 138 | 9.6 X 100 | 0 (0) | 100 (12) |  | -9.6 | 93 |
| 32 | US | 6 | Chamber | Int | 12 | 1.6 X 10-1 | 11 (1.2) | 120 (10) | OVER | 10 | 120 |
|  | 32 | US | 6 | VRPM | Int | 149 | 3.2 X 10+1 | 11 (1.2) | 120 (10) |  | -22 | 86 |
| Bogner et al. (2014) | 33 | US | 10 | Chamber | Int | 1 | 4.1 X 10-1 | 25 (8.1) | 100 (14) | OVER | 25 | 101 |
| 33 | US | 10 | VRPM | Int | 814 | 1.9 X 10+1 | 25 (8.1) | 100 (14) |  | 6.1 | 82 |
| 33 | US | 6 | Chamber | Int | 2 | 1.0 X 10+1 | 0 (0) | 75 (10) |  | -10 | 65 |
|  | 33 | US | 6 | VRPM | Int | 357 | 4.6 X 100 | 0 (0) | 75 (10) |  | -4.6 | 71 |
| Bogner et al. (2014) | 34 | US | A | Chamber | Daily | 8 | 2.9 X 100 | 2.3 (1.8) | 2.3 (1.8) | UNDER | -0.7 | -0.7 |
| 34 | US | A | Chamber | Int | 32 | 4.0 X 10-2 | 0 (0) | 130 (12) |  | -0.04 | 130 |
|  |  |  |  |  |  |  |  |  |  | **Average** | **-2.3 (99)** | **64 (120)** |

**Notes:**

This table summarizes site-specific field data used for the CALMIM comparisons.

Column headings as follows:

**Ref** indicates REFERENCE. Most sites are referenced to summary data in Appendix E of Bogner et al. (2014). Other comparisons referenced to newer literature.

**Site #** is the site number.

**Country** is the 2-character country code (ISO 3166).

**Month** is the numerical month of the field measurements when monthly data were used for the CALMIM comparisons. An **A** indicates the annual average emissions were used for the comparison when sufficient data existed for this comparison [e.g., 12 months of field data] or when no specific timing for field measurements was provided in the reference.

**Method** is the measurement method (NOTE: comparison required cover-specific data, precluding most studies using tracer methods):

**Chamber** (static or dynamic)

**Tracer** (one older French study using SF6**)**

**VRPM** (Vertical Radial Plume Mapping).

**Cover** specifies the cover type: Daily, Int (Intermediate), Final, BC (Biocover).

**n** is the number of field measurements that comprise the average value with a blank indicating that this information was not available for the referenced data.

**Error with** is the absolute error between the CALMIM prediction with oxidation and the measured result.

**Error without** is the absolute error between the CALMIM prediction without oxidation and the measured result.

**Result** indicates if the CALMIM model statistically **OVER** or **UNDER** predicted the field measurement [inclusive of both the standard deviation of the model and the measured results].

**Table S3.** List of latitudinal study locations documenting the average annual temperature (C), total precipitation (mm), and average daily solar irradiance (MJ day-1) for each location.

| **#** | Latitude | Longitude | Precipitation (mm) | Average Temperature (oC) | Average Solar Irradiance (MJ day-1) |
| --- | --- | --- | --- | --- | --- |
| **1** | -52.16 | -71.37 | 431 | 5.6 | 90.15 |
| **2** | -49.04 | -75.06 | 782 | 9.3 | 86.41 |
| **3** | -48.46 | -71.02 | 297 | 6.6 | 145.57 |
| **4** | -44.47 | -73.83 | 1659 | 10.3 | 93.02 |
| **5** | -40.58 | -72.77 | 1338 | 9.6 | 158.26 |
| **6** | -36.03 | -71.89 | 730 | 13.4 | 197.34 |
| **7** | -36.03 | -65.39 | 488 | 15.8 | 194.43 |
| **8** | -36.03 | -60.29 | 1036 | 15.8 | 194.08 |
| **9** | -33.72 | -70.66 | 480 | 12.5 | 208.03 |
| **10** | -33.58 | -66.09 | 577 | 15.7 | 202.69 |
| **11** | -33.28 | -62.75 | 805 | 17.1 | 202.00 |
| **12** | -30.45 | -52.21 | 1520 | 18.7 | 169.76 |
| **13** | -30.3 | -62.23 | 770 | 19.4 | 205.99 |
| **14** | -30.3 | -58.18 | 1104 | 19.6 | 207.01 |
| **15** | -29.99 | -70.66 | 111 | 13.9 | 109.67 |
| **16** | -23.41 | -70.08 | 5 | 12.8 | 114.86 |
| **17** | -21.66 | -69.99 | 4 | 20.2 | 116.13 |
| **18** | -21.66 | -58.9 | 953 | 25.3 | 228.72 |
| **19** | -21.66 | -52.8 | 1279 | 22.8 | 211.96 |
| **20** | -21.66 | -46.79 | 1402 | 20.1 | 191.16 |
| **21** | -21.62 | -57.3 | 1175 | 25.3 | 226.84 |
| **22** | -18.1 | -64.85 | 560 | 18.3 | 237.02 |
| **23** | -16.47 | -50.62 | 1624 | 23.1 | 219.79 |
| **24** | -15.82 | -72.4 | 247 | 3.9 | 244.09 |
| **25** | -14.84 | -75.39 | 60 | 17.1 | 125.52 |
| **26** | -11.93 | -66.29 | 1463 | 24.5 | 198.10 |
| **27** | -11.62 | -57.3 | 1881 | 24.5 | 234.31 |
| **28** | -9.31 | -78.41 | 92 | 20.7 | 131.14 |
| **29** | -6.8 | -78.05 | 604 | 11.1 | 244.16 |
| **30** | -6.41 | -75.87 | 1495 | 26.7 | 238.06 |
| **31** | -5.7 | -80.41 | 46 | 24.8 | 260.76 |
| **32** | -5.18 | -76.51 | 1653 | 26.8 | 237.98 |
| **33** | -0.69 | -79.96 | 712 | 24.7 | 248.30 |
| **34** | 0.7 | -71.72 | 1710 | 23.2 | 195.28 |
| **35** | 0.87 | -77.3 | 2038 | 16.8 | 220.23 |
| **36** | 4.6 | -72.6 | 2014 | 26.9 | 183.83 |
| **37** | 8.76 | -80.38 | 2408 | 26.9 | 187.27 |
| **38** | 9.95 | -84.31 | 2081 | 17.9 | 223.03 |
| **39** | 12.87 | -85.1 | 1848 | 24.1 | 183.68 |
| **40** | 16.7 | -99.03 | 989 | 18.8 | 200.26 |
| **41** | 16.85 | -91.83 | 1918 | 24.0 | 233.58 |
| **42** | 20 | -99 | 545 | 16.8 | 237.17 |
| **43** | 21.45 | -79.98 | 1277 | 26.0 | 173.90 |
| **44** | 22.5 | -99 | 995 | 22.0 | 233.34 |
| **45** | 25 | -99 | 675 | 23.7 | 231.24 |
| **46** | 27.5 | -99 | 494 | 22.8 | 225.08 |
| **47** | 30 | -99 | 750 | 17.7 | 216.67 |
| **48** | 32.5 | -99 | 642 | 17.9 | 210.06 |
| **49** | 35 | -99 | 679 | 15.8 | 202.49 |
| **50** | 37.5 | -99 | 573 | 13.3 | 195.23 |
| **51** | 40 | -99 | 572 | 10.8 | 186.76 |
| **52** | 42.5 | -99 | 532 | 9.0 | 177.65 |
| **53** | 45 | -99 | 407 | 6.3 | 170.57 |
| **54** | 47.5 | -99 | 398 | 4.0 | 161.84 |
| **55** | 50 | -99 | 369 | 2.5 | 151.74 |
| **56** | 52.5 | -99 | 325 | -0.2 | 138.23 |
| **57** | 55 | -99 | 362 | -2.2 | 130.93 |
| **58** | 57.5 | -99 | 320 | -5.5 | 123.68 |
| **59** | 60 | -99 | 176 | -8.5 | 119.71 |
| **60** | 65 | -99 | 104 | -13.2 | 107.94 |
| **61** | 70 | -109 | 63 | -14.6 | 97.06 |
| **62** | 72.5 | -99 | 60 | -15.8 | 91.58 |

**Table S4.** Correlation coefficients and p-values for correlations between selected climate variables and CH4 emissions for the two California sites with contrasting future climate scenarios.

| Variable 1 | Variable 2 | **Site 1 (Eureka, CA)** | | | **Site 2 (Lancaster, CA)** | | |
| --- | --- | --- | --- | --- | --- | --- | --- |
|  |  | **R** | **p** |  | **R** | **p** |  |
|  |  |  |  |  |  |  |  |
| Max_C | Clay_without | 0.104 | 0.645 |  | 0.031 | 0.928 |  |
| Max_C | Clay_with | **-0.749** | **0.000** | ******* | 0.150 | 0.660 |  |
| Max_C | Silt_without | -0.003 | 0.990 |  | -0.058 | 0.865 |  |
| Max_C | Silt_with | **-0.849** | **0.000** | ******* | 0.133 | 0.696 |  |
| Max_C | Loam_without | 0.036 | 0.873 |  | -0.025 | 0.941 |  |
| Max_C | Loam_with | -0.157 | 0.486 |  | -0.017 | 0.961 |  |
|  |  |  |  |  |  |  |  |
| Min_C | Clay_without | -0.145 | 0.519 |  | -0.126 | 0.713 |  |
| Min_C | Clay_with | **-0.817** | **0.000** | ******* | -0.016 | 0.962 |  |
| Min_C | Silt_without | -0.237 | 0.288 |  | -0.200 | 0.555 |  |
| Min_C | Silt_with | **-0.856** | **0.000** | ******* | -0.035 | 0.918 |  |
| Min_C | Loam_without | -0.209 | 0.351 |  | -0.172 | 0.613 |  |
| Min_C | Loam_with | -0.396 | 0.068 |  | -0.170 | 0.618 |  |
|  |  |  |  |  |  |  |  |
| Rain | Clay_without | **-0.633** | **0.002** | ******* | **-0.913** | **0.000** | ******* |
| Rain | Clay_with | **-0.725** | **0.000** | ******* | **-0.816** | **0.002** | ******* |
| Rain | Silt_without | **-0.654** | **0.001** | ******* | **-0.927** | **0.000** | ******* |
| Rain | Silt_with | -0.374 | 0.086 |  | **-0.847** | **0.001** | ******* |
| Rain | Loam_without | **-0.654** | **0.001** | ******* | **-0.929** | **0.000** | ******* |
| Rain | Loam_with | -0.376 | 0.084 |  | **-0.891** | **0.000** | ******* |

**Table S5.** CALMIM-modeled annual average CH4 emissions [g CH4 m-2 d-1] with and without oxidation for Year 2058 for hypothetical Site 2 (Lancaster, CA) assuming various textures for 1 m final cover soil.

| **Texture Name** | **Clay** | **Silt** | **Sand** | **Year** | **without** | **with** | **% Oxidation** |
| --- | --- | --- | --- | --- | --- | --- | --- |
| Clay | 90 | 5 | 5 | 2058 | 73.69 | 14.53 | 80% |
| Silt | 4 | 88 | 8 | 2058 | 159.85 | 4.75 | 97% |
| Silty loam | 10 | 70 | 20 | 2058 | 147.88 | 15.52 | 90% |
| Clay loam | 35 | 35 | 30 | 2058 | 118.58 | 36.66 | 69% |
| Loam | 20 | 40 | 40 | 2058 | 156.82 | 42.93 | 73% |
| Sandy clay loam | 40 | 15 | 45 | 2058 | 138.46 | 64.53 | 53% |
| Sandy clay | 45 | 5 | 50 | 2058 | 107.47 | 54.18 | 50% |
| Sandy clay | 40 | 5 | 55 | 2058 | 107.47 | 54.18 | 50% |
| Sandy loam | 10 | 25 | 65 | 2058 | 181.29 | 25.48 | 86% |
| Loamy sand | 6 | 12 | 82 | 2058 | 207.71 | 0 | 100% |

**References:**

Abushammala MFM, Basri NEA, Younes MK. 2016. Seasonal variation of landfill methane and carbon dioxide emissions in a tropical climate. *International Journal of Environmental Science and Development* **7**(8): 586-590.

Ascher UM, Petzold LR. 1998. *Computer methods for ordinary differential equations and differential-algebraic equations*. Siam.

Battaglini R, Raco B, Scozzari A. 2013. Effective monitoring of landfills: flux measurements and thermography enhance efficiency and reduce environmental impact. *Journal of Geophysics and Engineering* **10**(6). doi:10.1088/1742-2132/10/6/064002.

Bel Hadj Ali N, Abichou T, Green R. 2020. Comparing estimates of fugitive landfill methane emissions using inverse plume modeling obtained with Surface Emission Monitoring (SEM), Drone Emission Monitoring (DEM), and Downwind Plume Emission Monitoring (DWPEM). *Journal of the Air & Waste Management Association* **70**(4): 410-424. doi:10.1080/10962247.2020.1728423.

Bogner J, Spokas K, Corcoran M. 2014. International field validation of CALMIM: A site-specific process-based model for landfill methane (CH4) emissions inclusive of seasonal CH4 oxidation 412. Available at <https://erefdn.org/wp-content/uploads/2015/12/IPCC_Final_Report.pdf>. Accessed 10-20-20.

Bogner JE, Chanton JP, Blake D, Abichou T, Powelson D. 2010. Effectiveness of a Florida landfill biocover for reduction of CH4 and NMHC emissions. *Environmental Science & Technology* **44**(4): 1197-1203.

Bogner JE, Spokas KA, Chanton JP. 2011. Seasonal greenhouse gas emissions (methane, carbon dioxide, nitrous oxide) from engineered landfills: daily, intermediate, and final California cover soils. *J Environ Qual* **40**(3): 1010-20. doi:10.2134/jeq2010.0407.

Börjesson G, Svensson BH. 1997. Seasonal and diurnal methane emissions from a landfill and their regulation by methane oxidation. *Waste Management & Research* **15**(1): 33-54.

Cambaliza M, Shepson P, Bogner J, Caulton D, Stirm B, et al. 2015. Quantification and source apportionment of the methane emission flux from the city of Indianapolis. *Elem Sci Anth* **3**.

Cambaliza MOL, Bogner JE, Green RB, Shepson PB, Harvey TA, et al. 2017. Field measurements and modeling to resolve m2 to km2 CH4 emissions for a complex urban source: An Indiana landfill study. *Elem Sci Anth* **5**.

Campbell GS. 1985. *Soil physics with BASIC: transport models for soil-plant systems*. Elsevier.

Cusworth DH, Duren RM, Thorpe AK, Tseng E, Thompson D, et al. 2020. Using remote sensing to detect, validate, and quantify methane emissions from California solid waste operations. *Environmental Research Letters* **15**(5): 054012. doi:10.1088/1748-9326/ab7b99.

Daugėla I, Visockienė JS, Kumpienė J. 2020. Detection and analysis of methane emissions from a landfill using unmanned aerial drone systems and semiconductor sensors. *Detritus-Multidisciplinary Journal for Wwaste Resources and Residues*: 1-12.

Duren RM, Thorpe AK, Foster KT, Rafiq T, Hopkins FM, et al. 2019. California’s methane super-emitters. *Nature* **575**(7781): 180-184. doi:10.1038/s41586-019-1720-3.

Gollapalli M, Kota SH. 2018. Methane emissions from a landfill in north-east India: Performance of various landfill gas emission models. *Environmental Pollution* **234**: 174-180.

IPCC. 2006. *IPCC guidelines for national greenhouse gas inventories*. Japan: IGES [Institute for Global Environmental Strategies].

Izumoto S, Hamamoto S, Kawamoto K, Nagamori M, Nishimura T. 2018. Monitoring of methane emission from a landfill site in daily and hourly time scales using an automated gas sampling system. *Environmental Science and Pollution Research* **25**(24): 24500-24506. doi:10.1007/s11356-018-2671-1.

Jain P, Wally J, Townsend TG, Krause M, Tolaymat T. 2021. Greenhouse gas reporting data improves understanding of regional climate impact on landfill methane production and collection. *PLoS One* **16**(2): e0246334. doi:10.1371/journal.pone.0246334.

Kim YM, Park MH, Jeong S, Lee KH, Kim JY. 2021. Evaluation of error inducing factors in unmanned aerial vehicle mounted detector to measure fugitive methane from solid waste landfill. *Waste Management* **124**: 368-376.

Li H, Meng B, Yue B, Gao Q, Ma Z, et al. 2020. Seasonal CH4 and CO2 effluxes in a final covered landfill site in Beijing, China. *Science of The Total Environment* **725**: 138355. doi:<https://doi.org/10.1016/j.scitotenv.2020.138355>.

Maciel FJ, Jucá JFT. 2011. Evaluation of landfill gas production and emissions in a MSW large-scale Experimental Cell in Brazil. *Waste Management* **31**(5): 966-977.

Martinez B, Miller TW, Yalin AP. 2020. Cavity ring-down methane sensor for small unmanned aerial systems. *Sensors* **20**(2): 454.

Maurice C, Lagerkvist A. 2003. LFG emission measurements in cold climatic conditions: seasonal variations and methane emissions mitigation. *Cold Regions Science and Technology* **36**(1-3): 37-46.

Meyer-Dombard DAR, Bogner JE, Malas J. 2020. A review of landfill microbiology and ecology: A call for modernization with ‘next generation’technology. *Frontiers in Microbiology* **11**: 1127.

NASEM. 2018. Improving Characterization of Anthropogenic Methane Emissions in the United States. Washington, DC: The National Academies Press.

Pierce DW, Kalansky JF, Cayan DR. 2018. Climate, drought, and sea level rise scenarios for California’s fourth climate change assessment. Technical Report CCCA4-CEC-2018-006, California Energy Commission. Available at <https://www.energy.ca.gov/sites/default/files/2019-07/Projections_CCCA4-CEC-2018-006.pdf>.

Spokas K, Bogner J, Chanton J. 2011. A process‐based inventory model for landfill CH4 emissions inclusive of seasonal soil microclimate and CH4 oxidation. *Journal of Geophysical Research: Biogeosciences* **116**(G4).

Spokas K, Bogner J, Corcoran M, Walker S. 2015. From California dreaming to California data: Challenging historic models for landfill CH4 emissions. *Elem Sci Anth* **3**.

Spokas K, Forcella F. 2006. Estimating hourly incoming solar radiation from limited meteorological data. *Weed Science* **54**(1): 182-189.

Spokas K, Forcella F. 2009. Software tools for weed seed germination modeling. *Weed Science* **57**(2): 216-227.

Spokas KA, Bogner JE. 2011. Limits and dynamics of methane oxidation in landfill cover soils. *Waste Manag* **31**(5): 823-32. doi:10.1016/j.wasman.2009.12.018.

Tummescheit H, Eborn J. 2002. Chemical reaction modeling with ThermoFluid/MF and MultiFlash. Proceedings of the 2th Modelica Conference.

Walker S. 2012. Landfill Data Compilation. Sacramento, CA: CalRecycle Engineering Support Branch.

Wang X, Jia M, Lin X, Xu Y, Ye X, et al. 2017. A comparison of CH4, N2O and CO2 emissions from three different cover types in a municipal solid waste landfill. *Journal of the Air & Waste Management Association* **67**(4): 507-515.

Zhang C, Guo Y, Wang X, Chen S. 2019. Temporal and spatial variation of greenhouse gas emissions from a limited-controlled landfill site. *Environment International* **127**: 387-394. doi:<https://doi.org/10.1016/j.envint.2019.03.052>.
